# Supplementary material
Source: ML conference proceedings conference paper supplement (https://openreview.net/forum?id=eWNEqdH0vk)

Entropy of Layer 2 / (7)

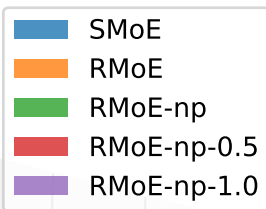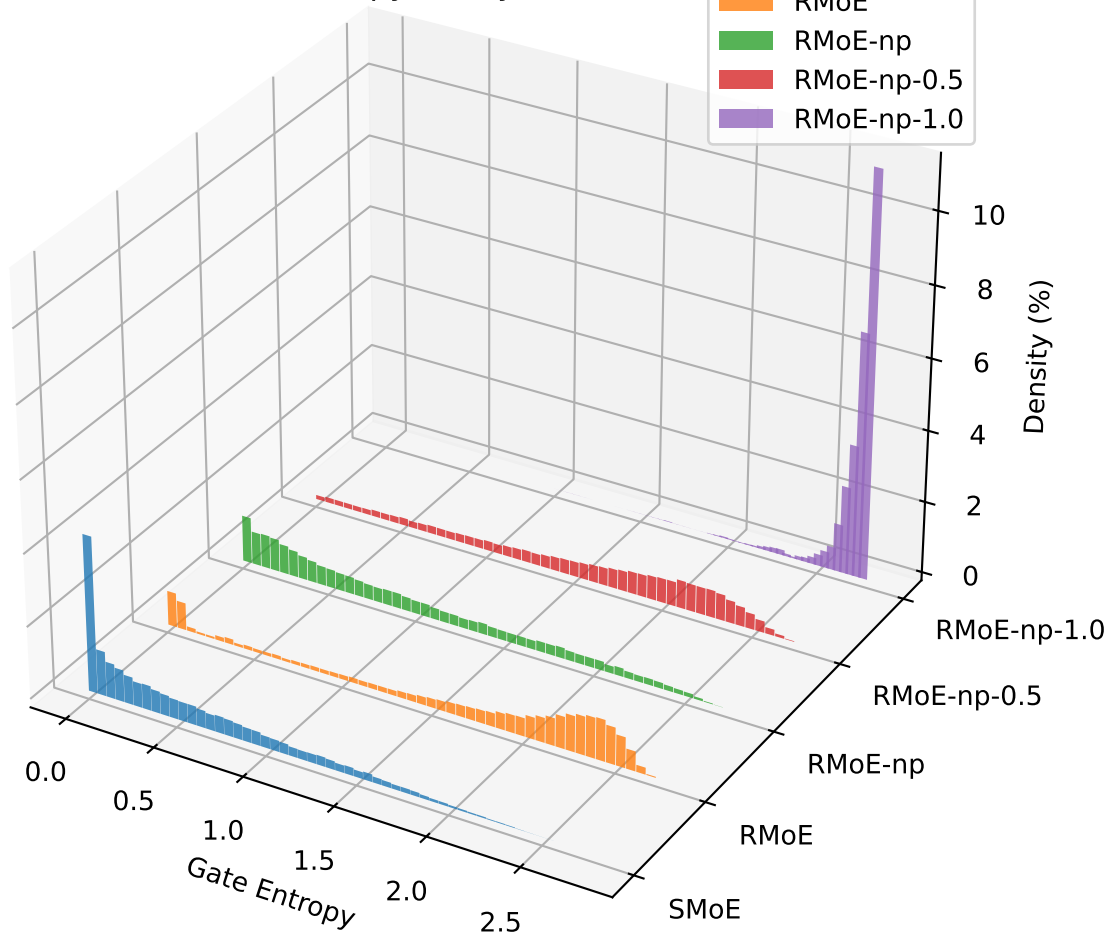

Supplement: supplementary_material [file attachment]

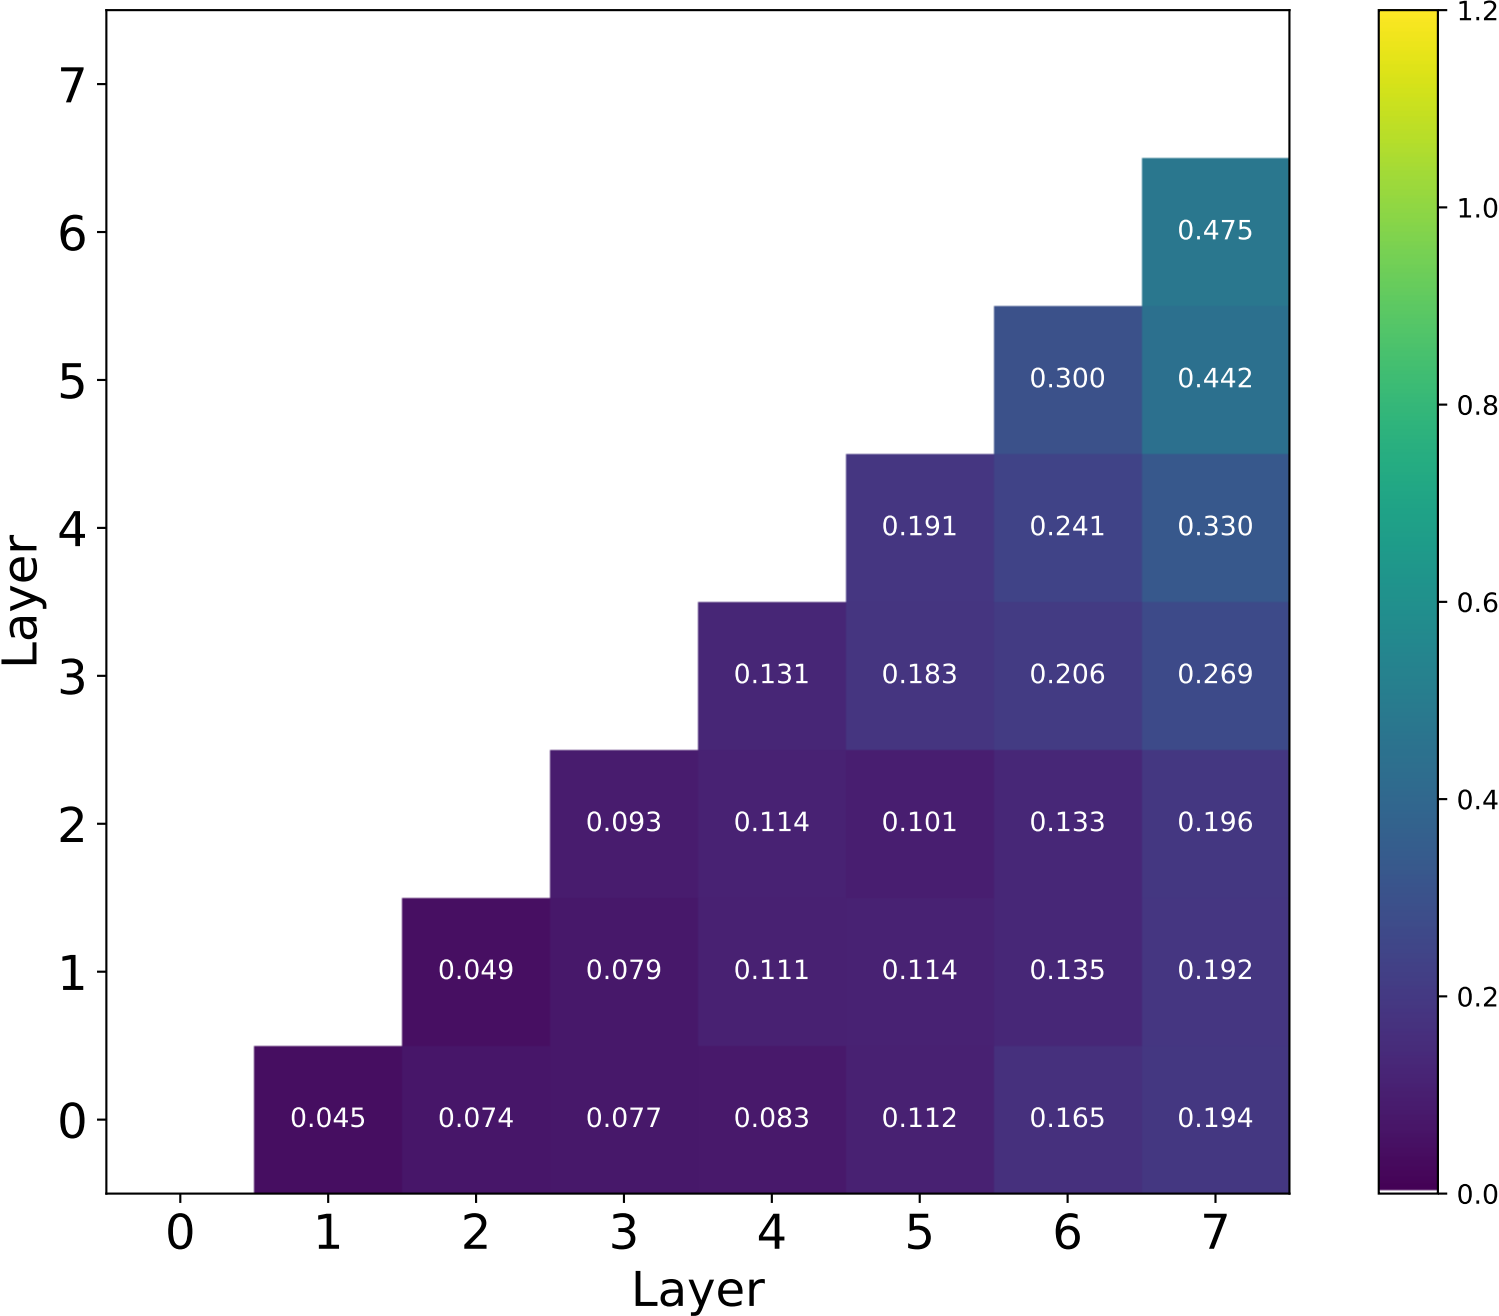

(c) Mean MI of HyperMoE

Supplement: supplementary_material [file attachment]

Expert Frequency of SMOE

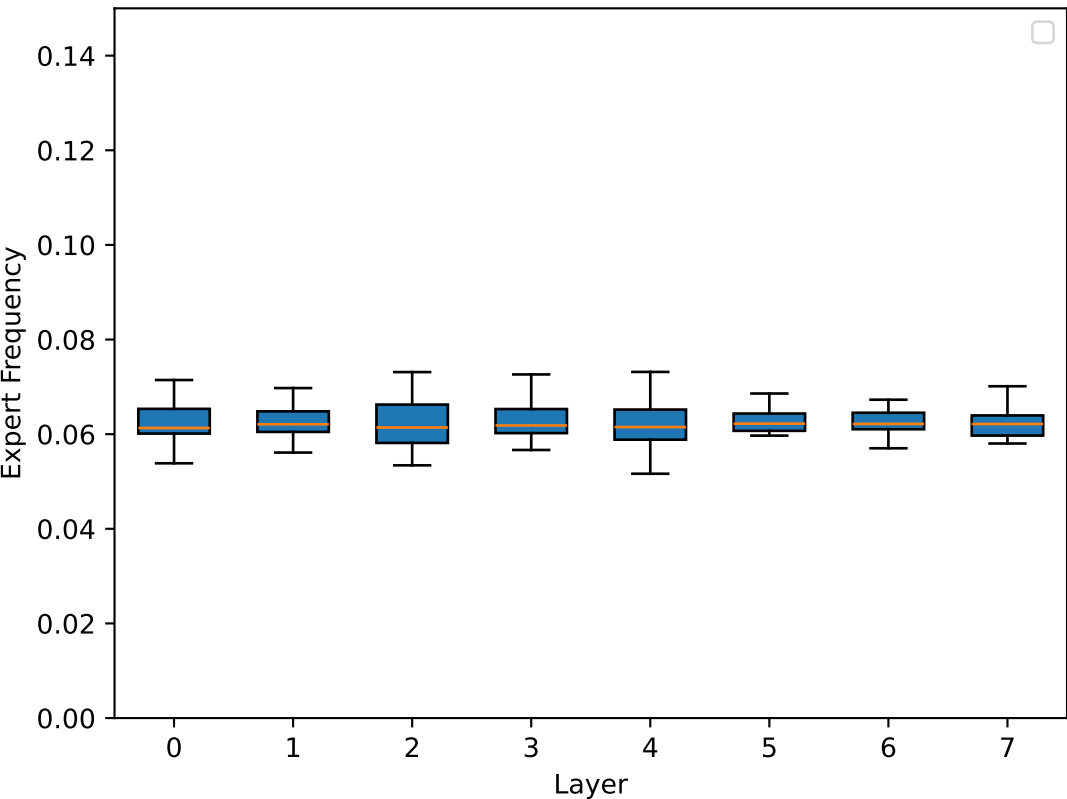

Supplement: supplementary_material [file attachment]

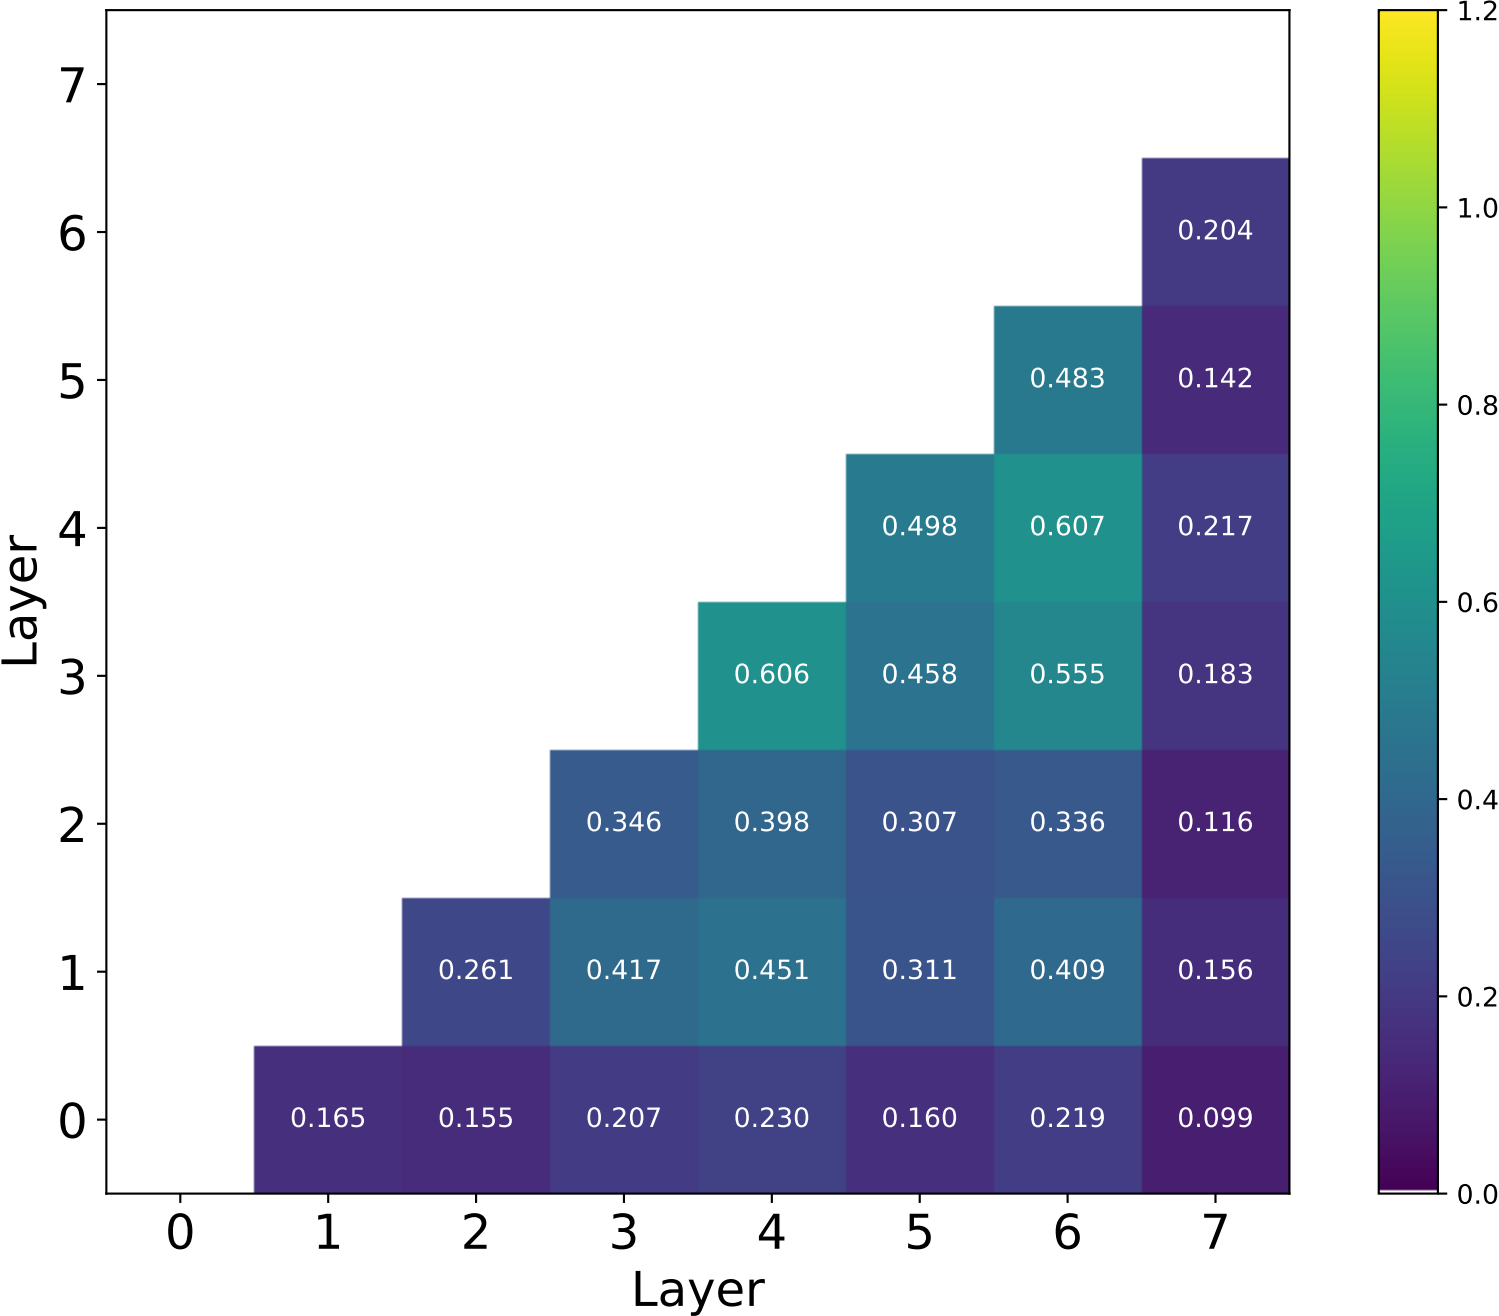

(b) Mean MI of XMoE

Supplement: supplementary_material [file attachment]

entropy of layer 0

Density k%

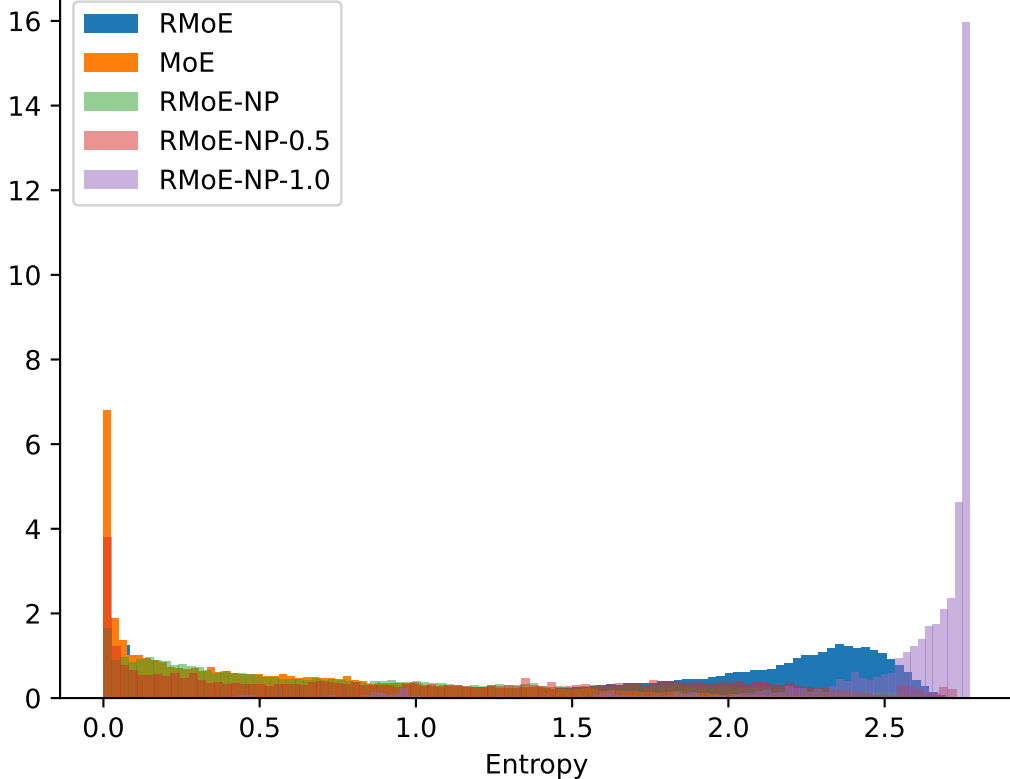

Supplement: supplementary_material [file attachment]

Entropy of Layer 3 / (7)

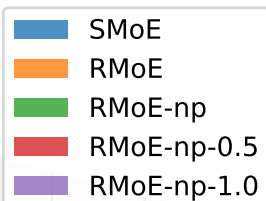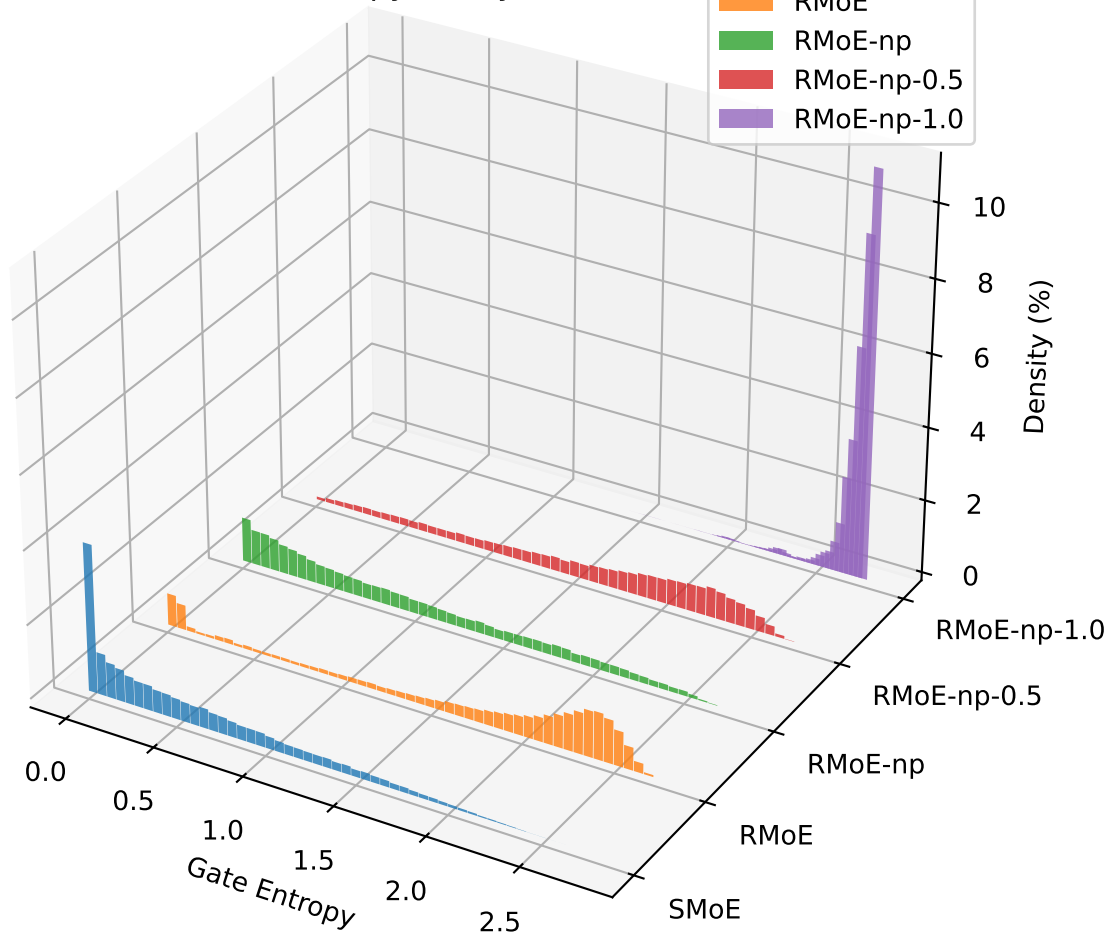

Supplement: supplementary_material [file attachment]

Expert Frequency of RMoE\_np\_05

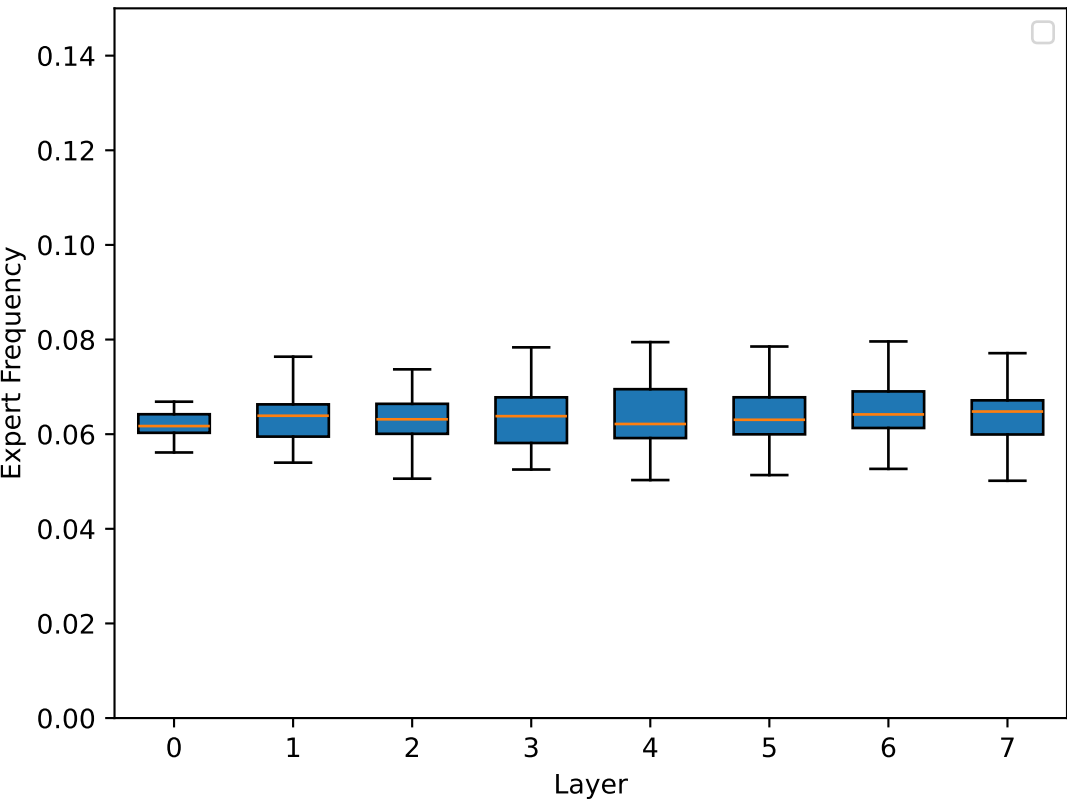

Supplement: supplementary_material [file attachment]

Entropy of Layer 0 / (7)

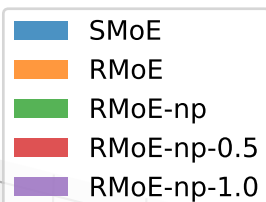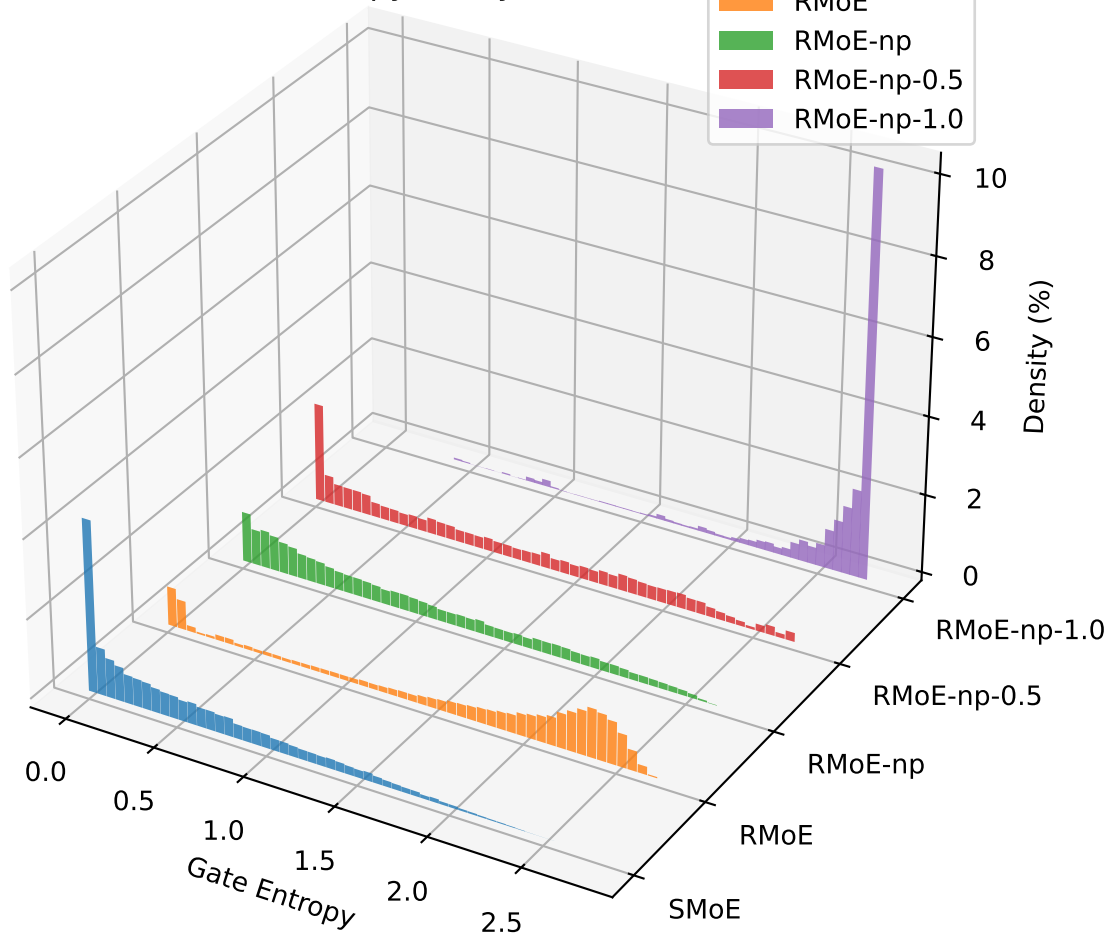

Supplement: supplementary_material [file attachment]

Entropy of Layer 1 / (7)

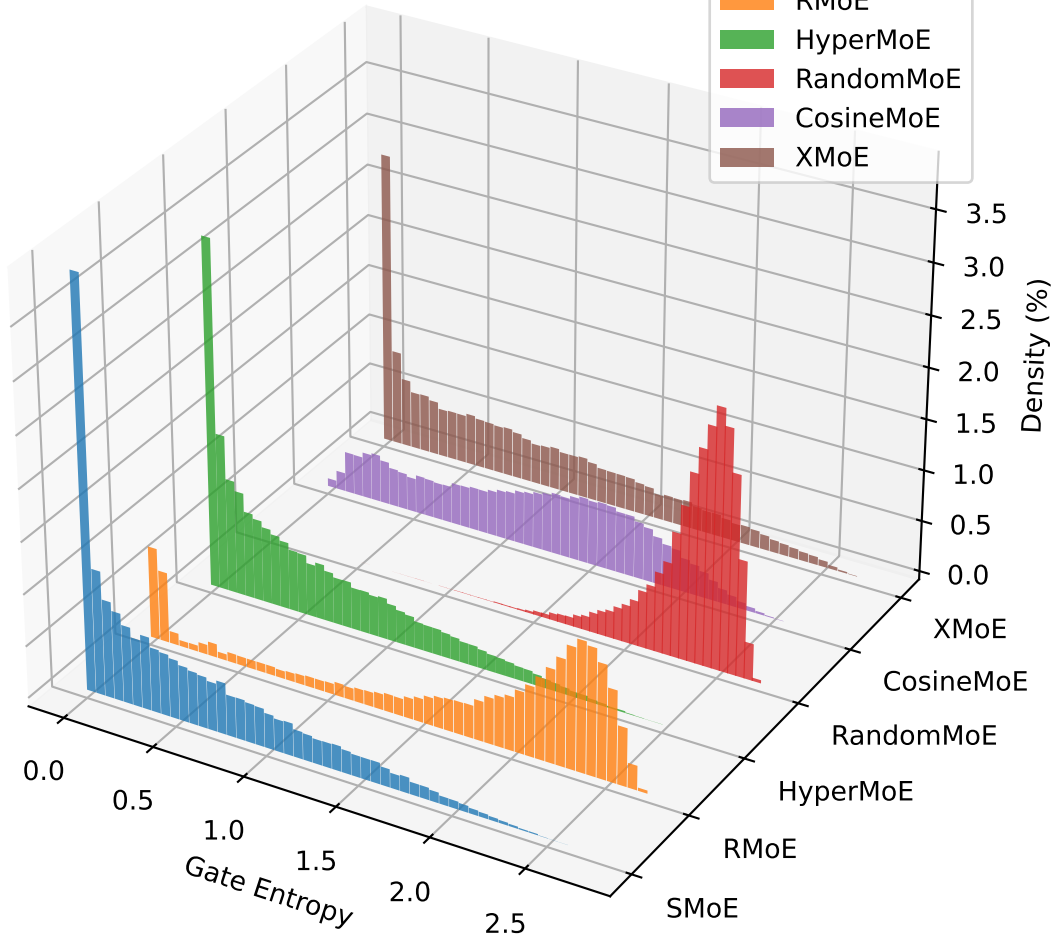

Supplement: supplementary_material [file attachment]

Entropy of Layer 4 / (7)

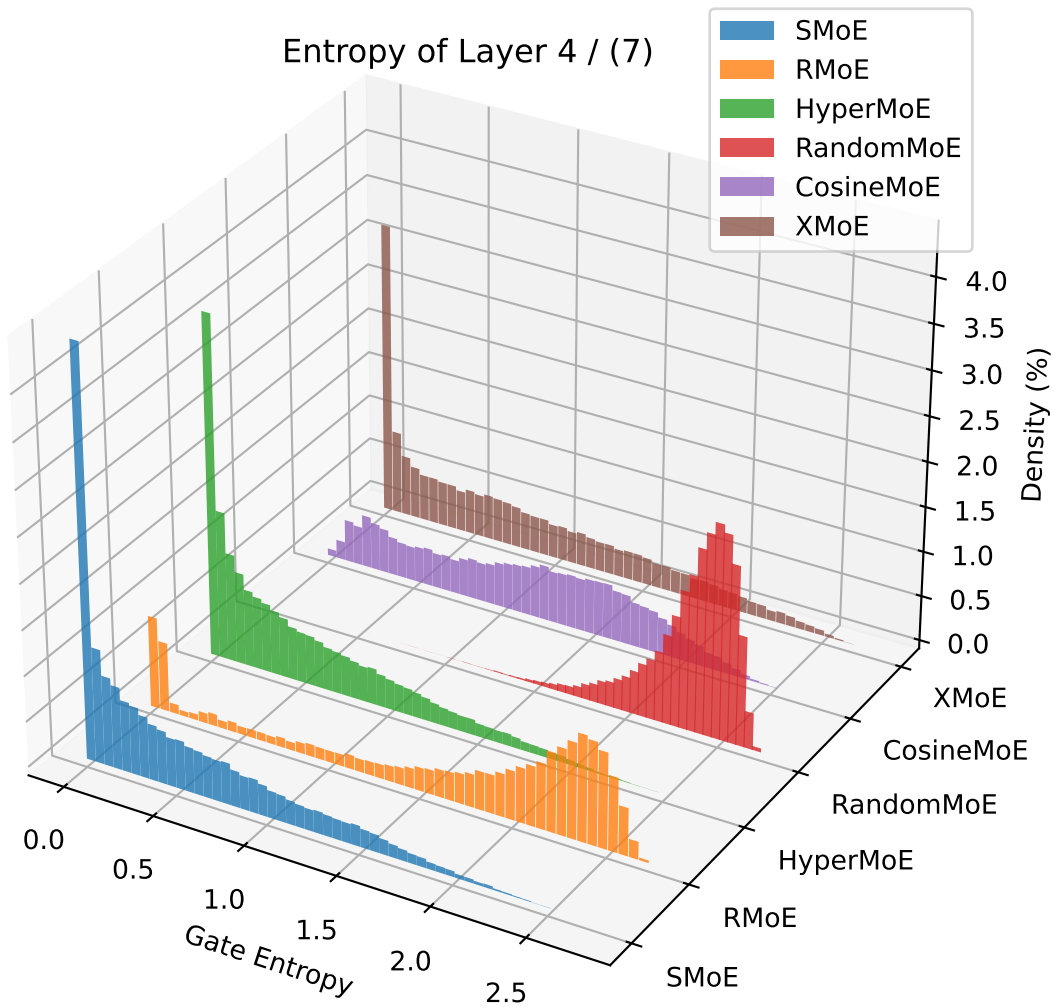

Supplement: supplementary_material [file attachment]

Expert Frequency of RandomMoE

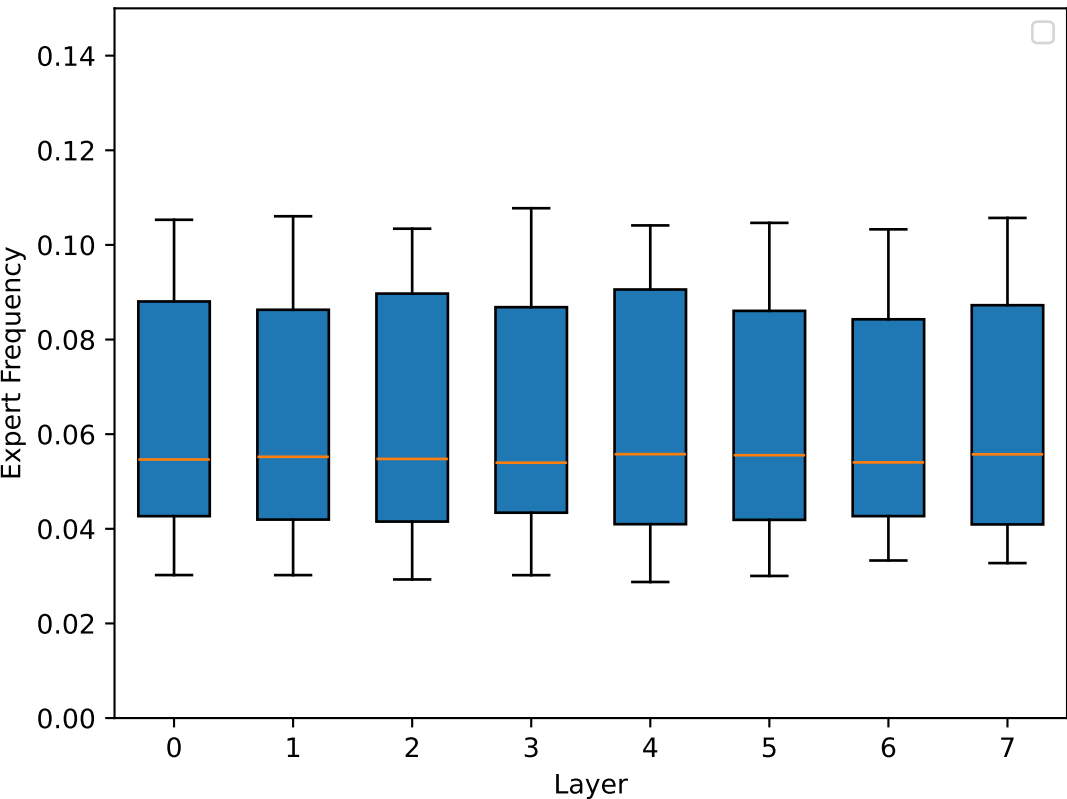

Supplement: supplementary_material [file attachment]

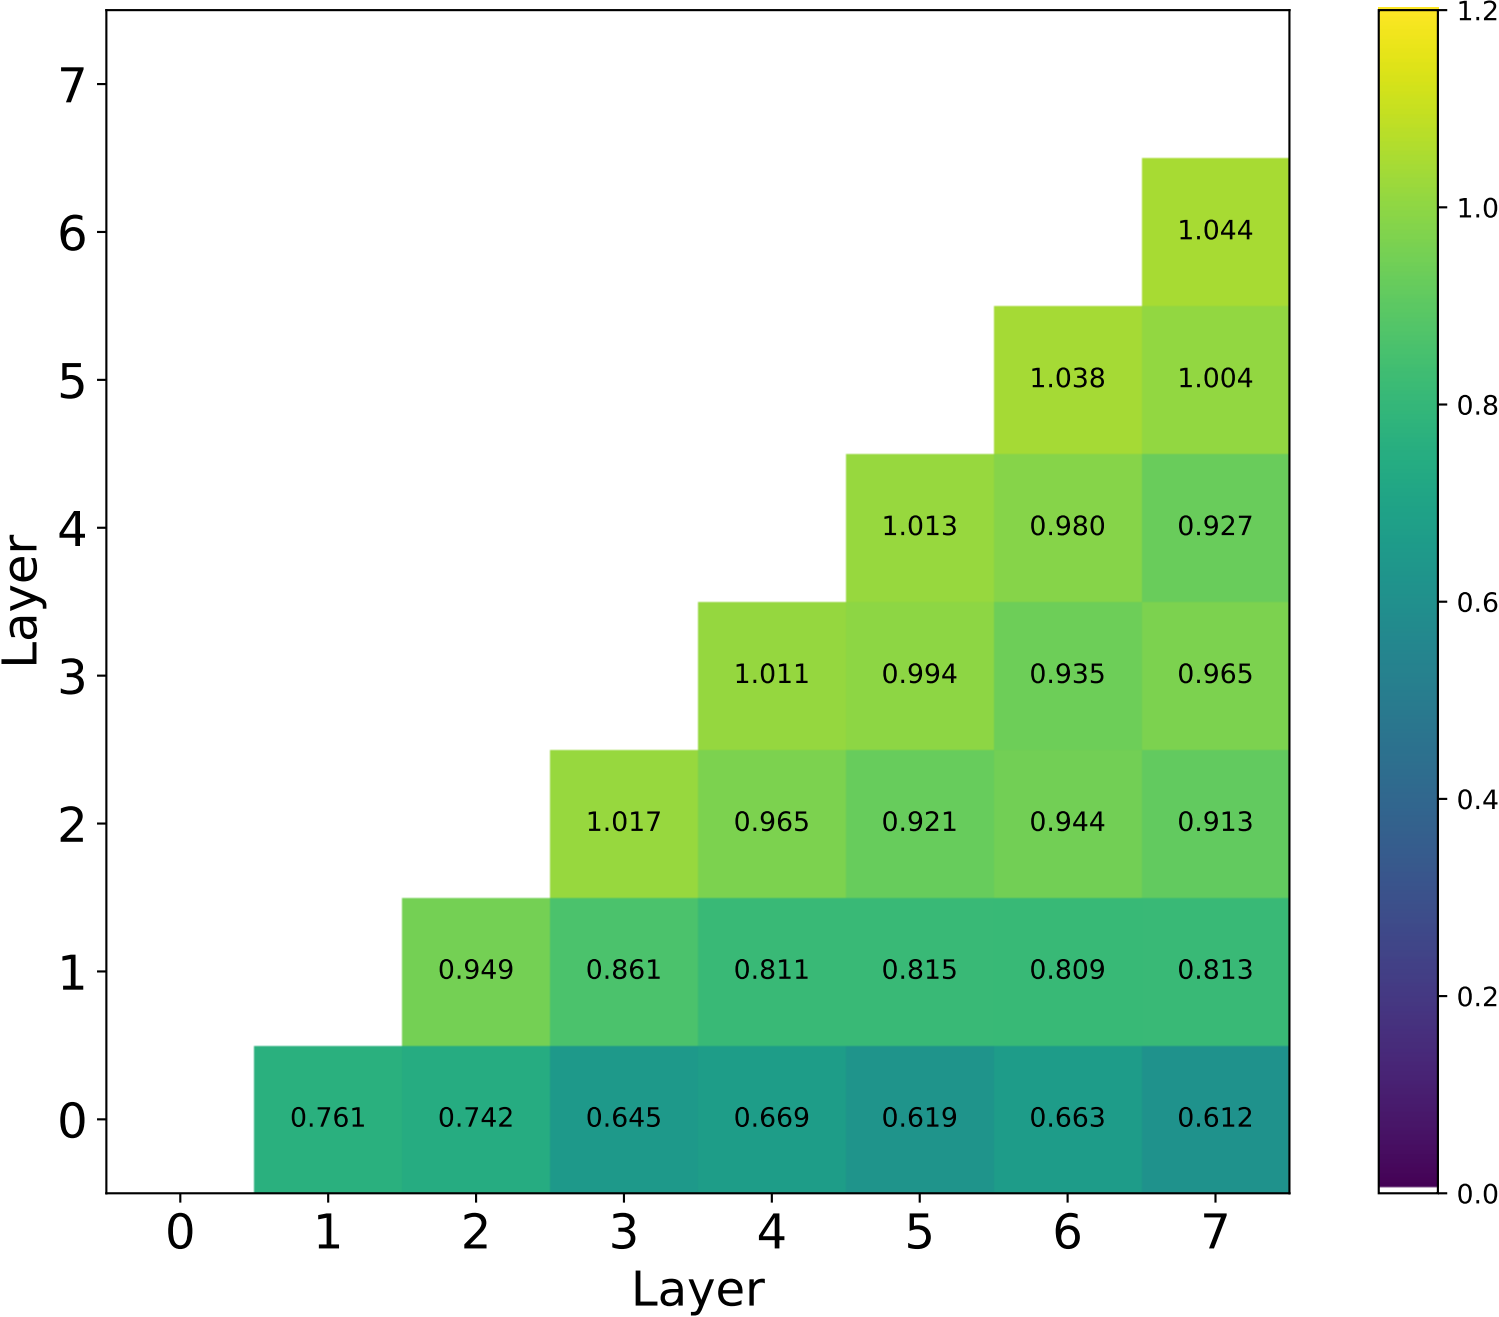

Mean MI of RMoE-NP-r0.5

Supplement: supplementary_material [file attachment]

Entropy of Layer 2

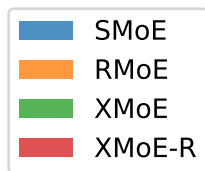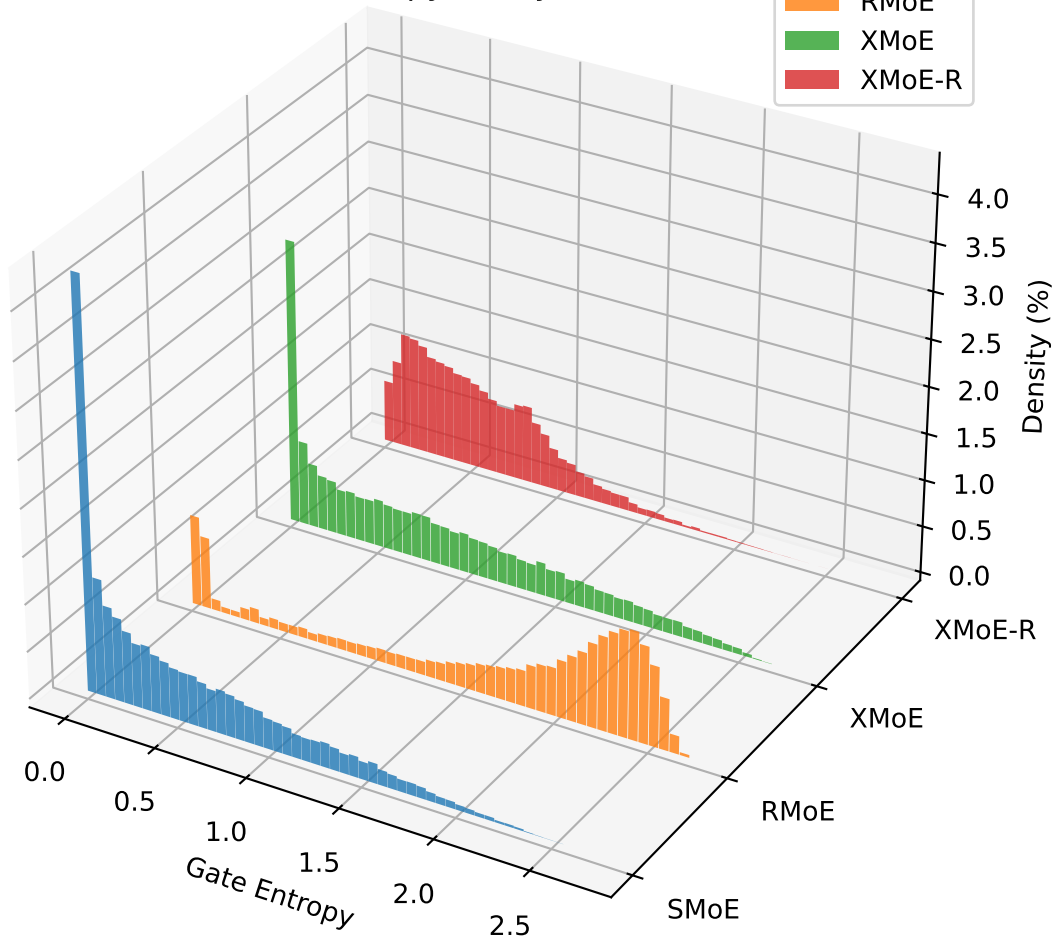

Supplement: supplementary_material [file attachment]

Entropy of Layer 0 / (7)

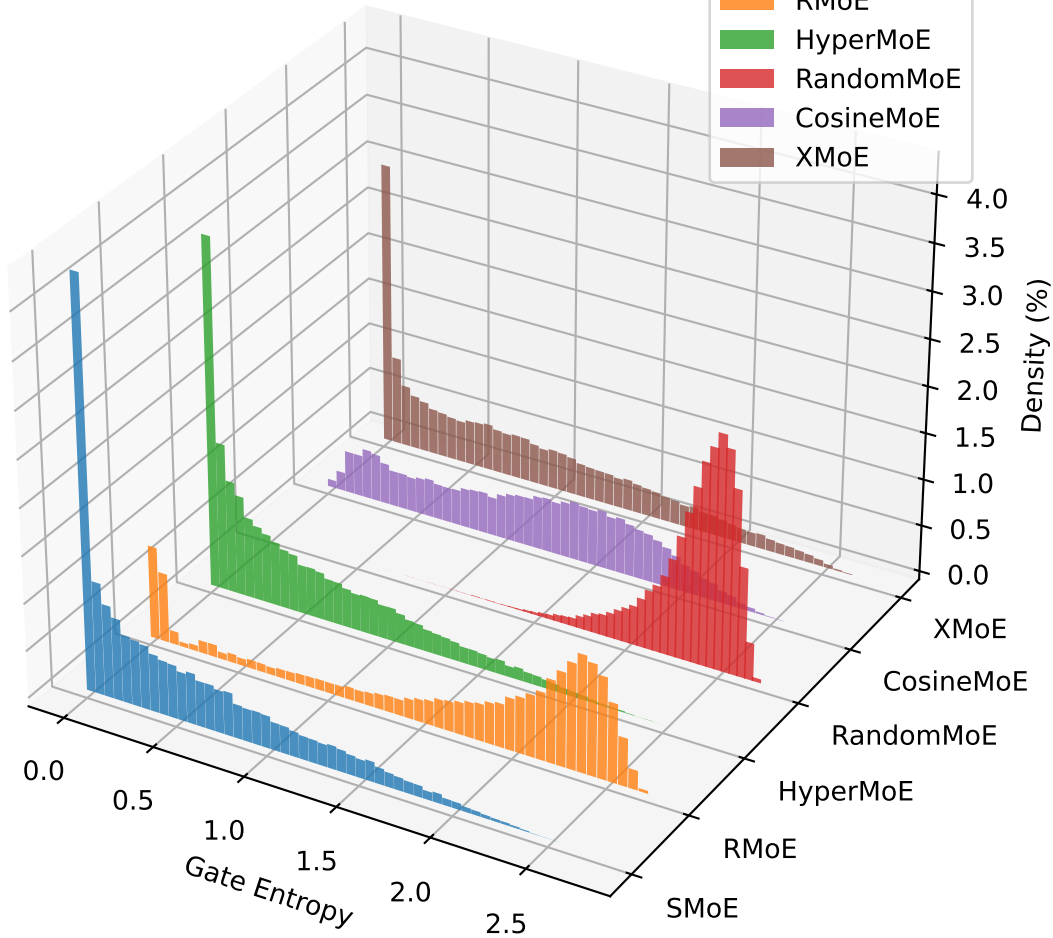

Supplement: supplementary_material [file attachment]

Entropy of Layer 4

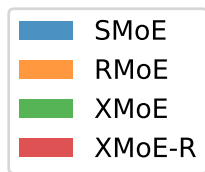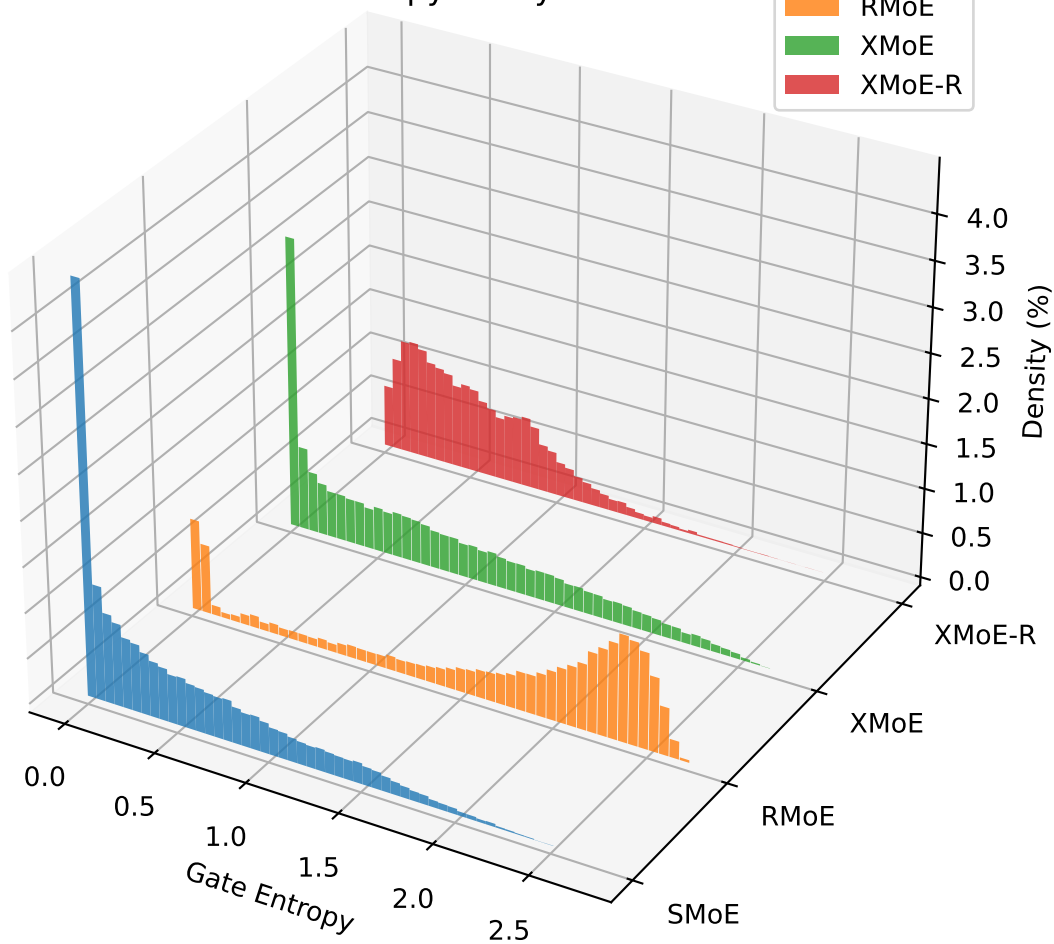

Supplement: supplementary_material [file attachment]

Entropy of Layer 7

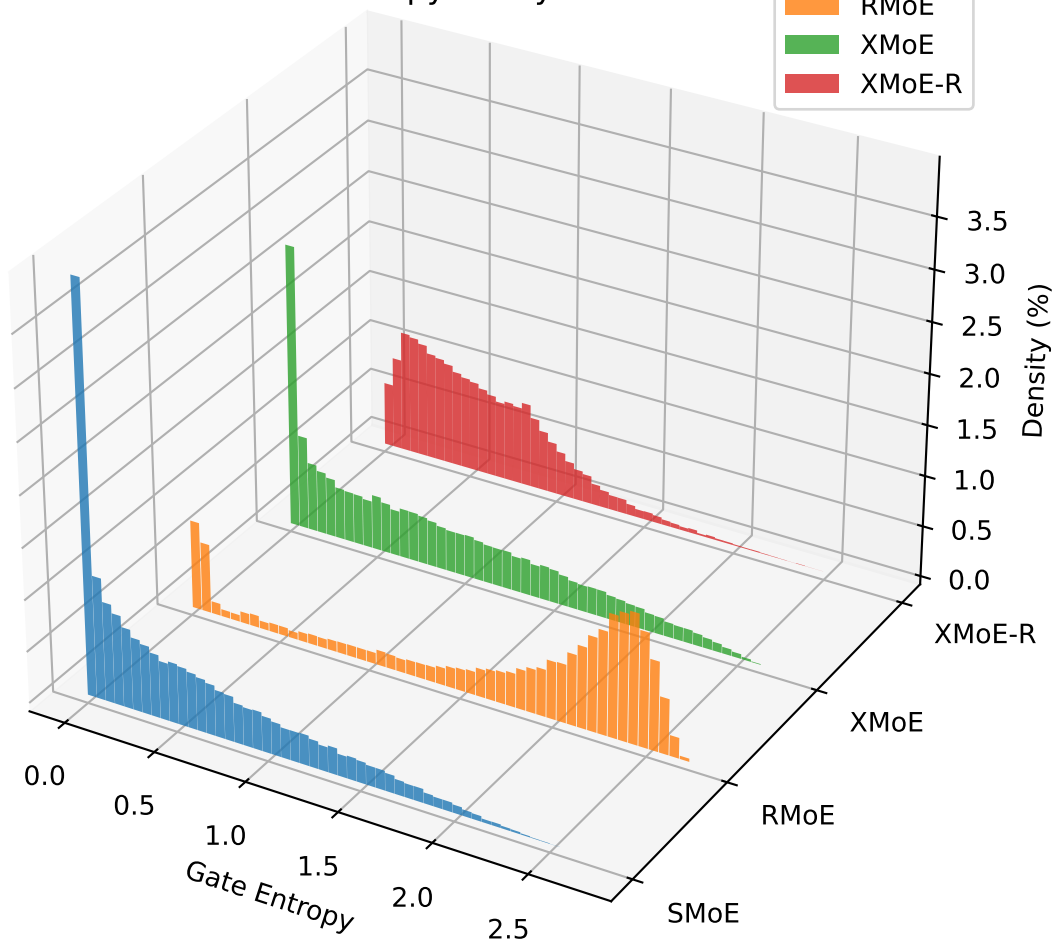

Supplement: supplementary_material [file attachment]

Entropy of Layer 2 / (7)

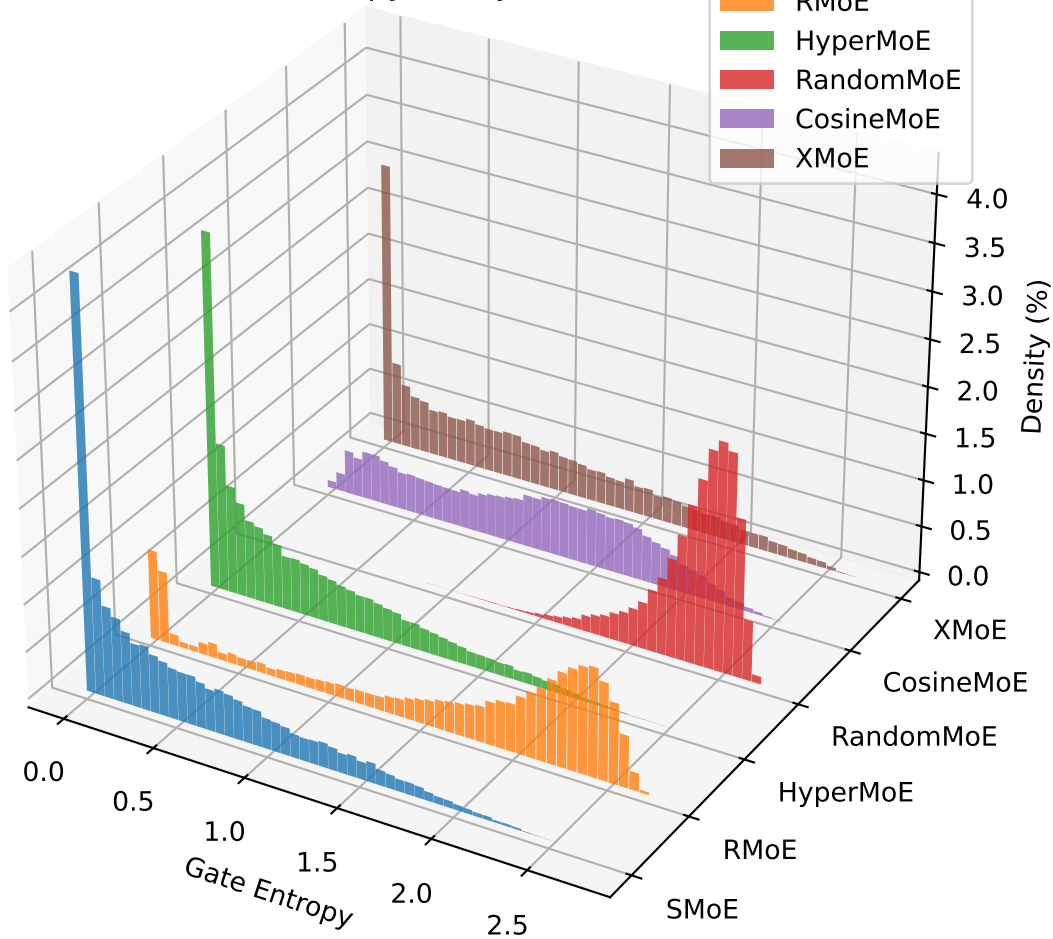

Supplement: supplementary_material [file attachment]

Expert Frequency of CosineMoE

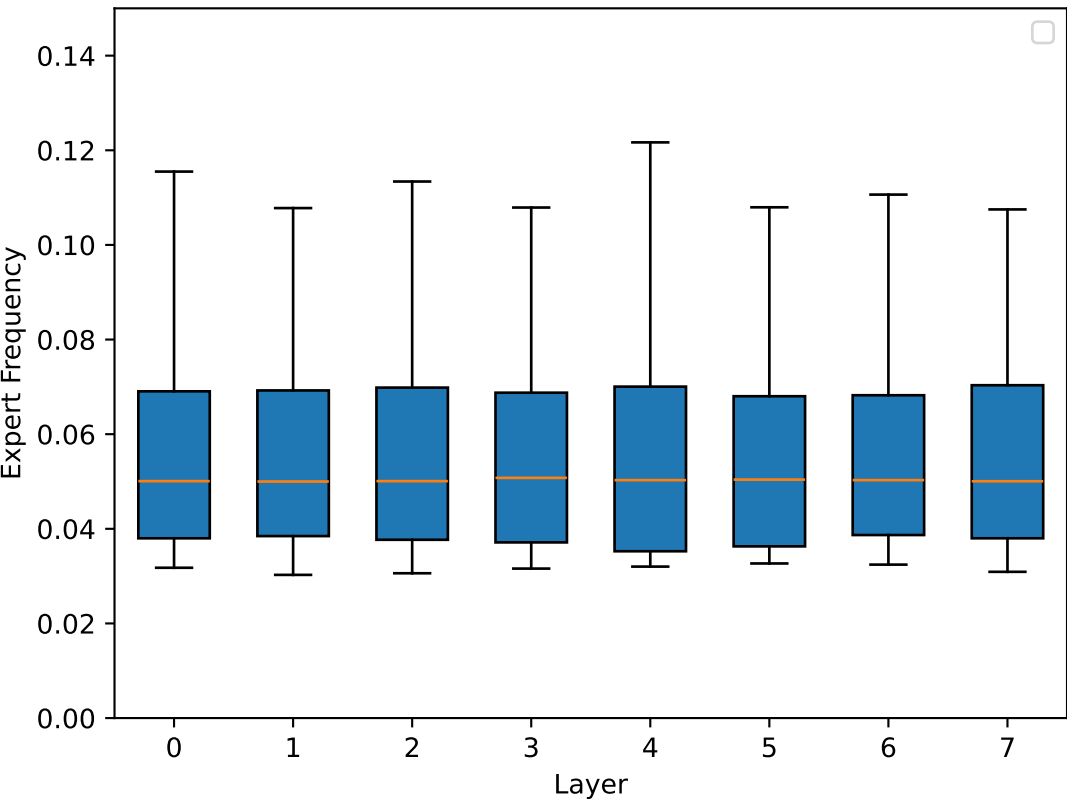

Supplement: supplementary_material [file attachment]

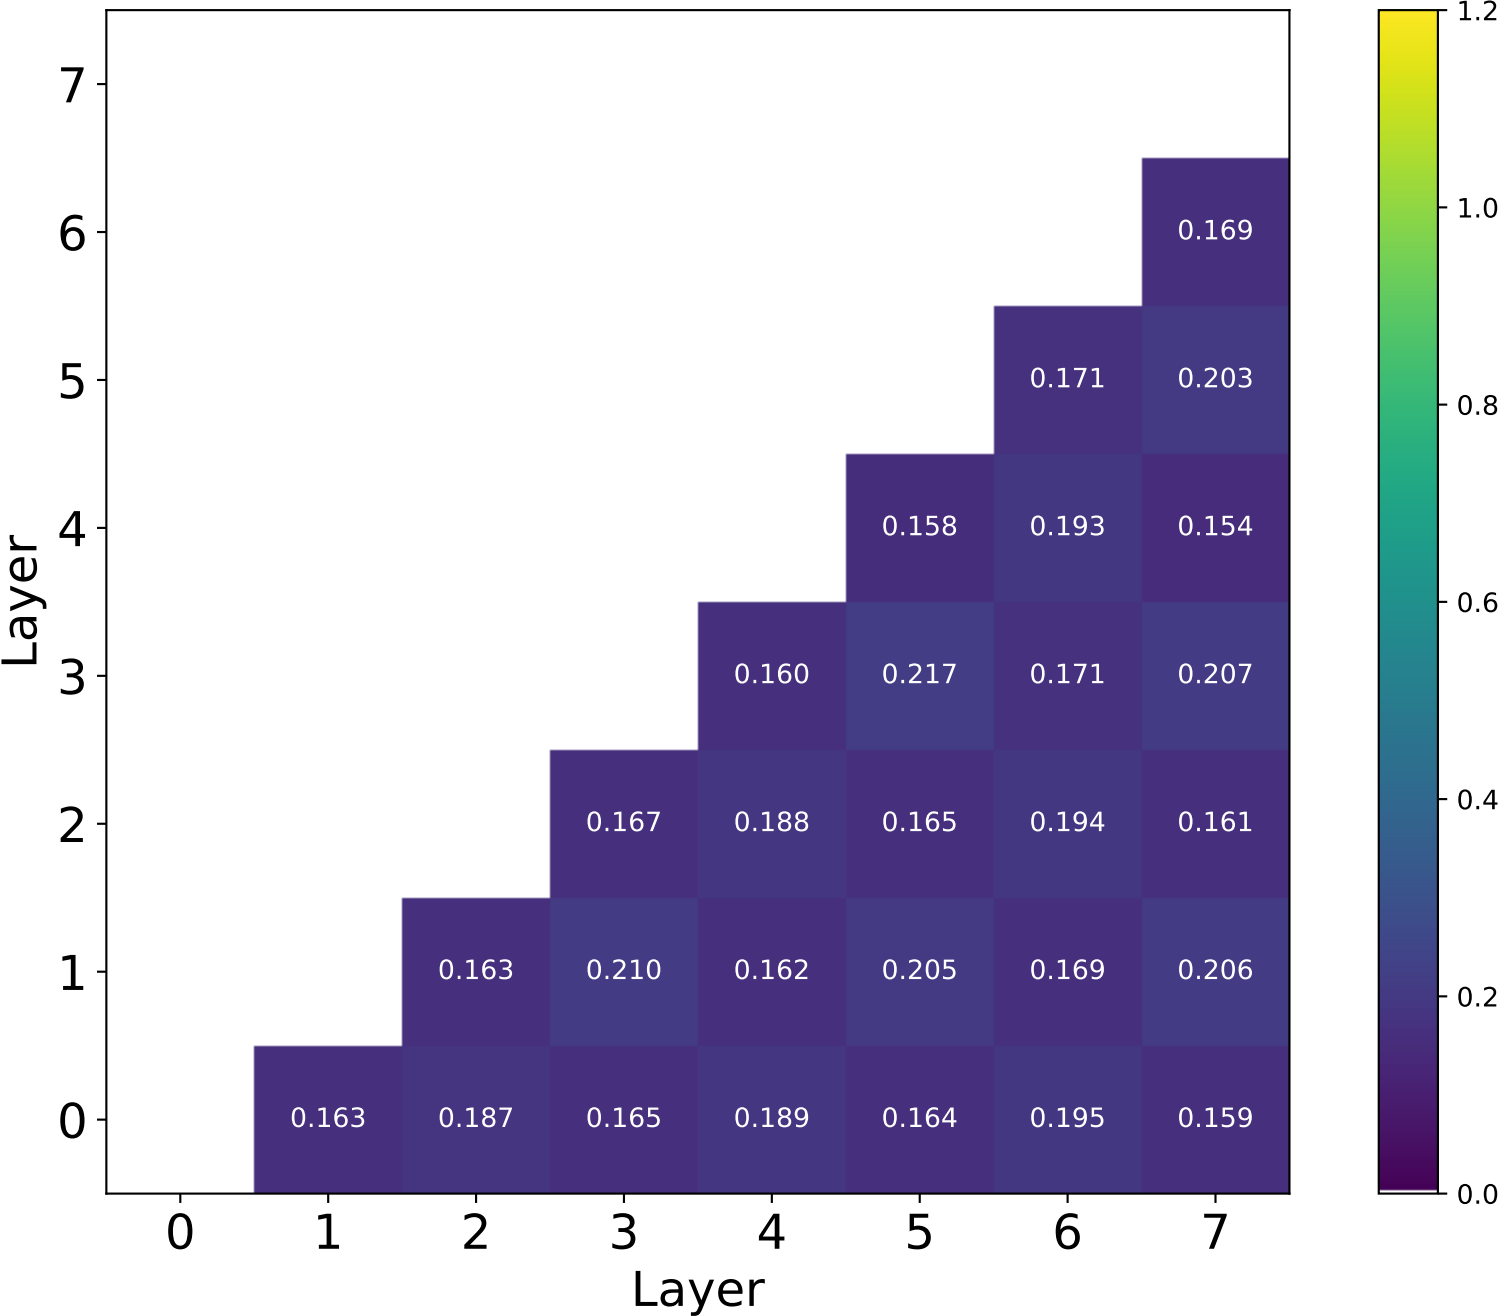

(a) Mean MI of SMOE

Supplement: supplementary_material [file attachment]

entropy of layer 3

Density k%

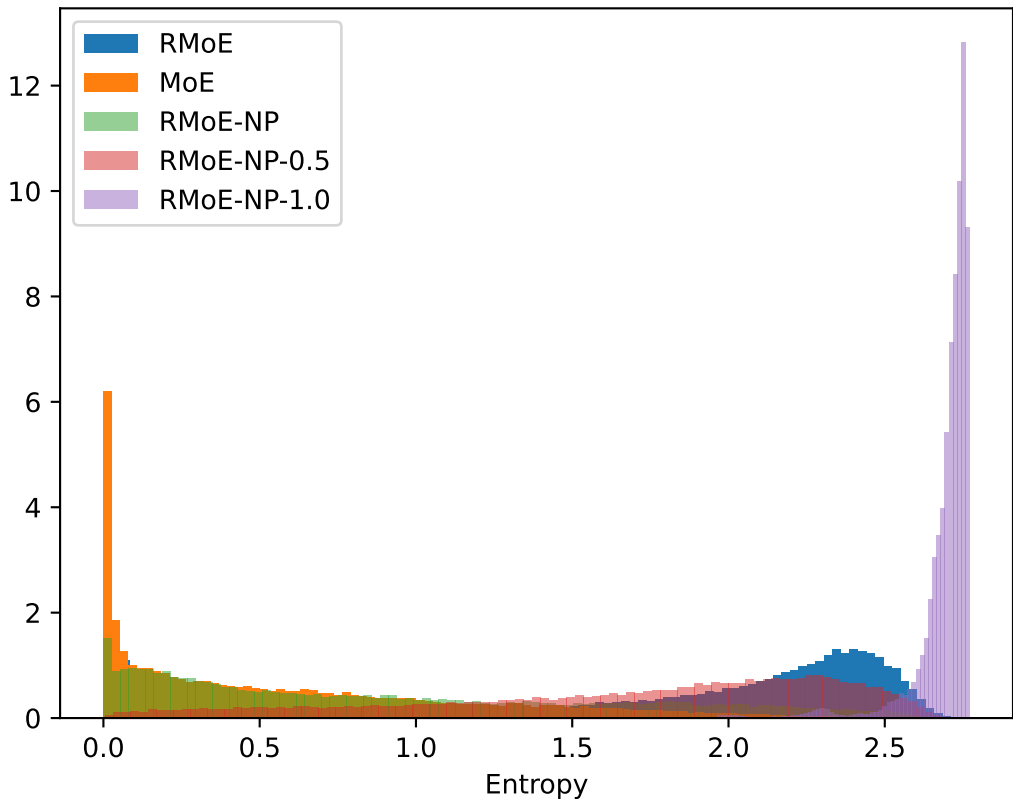

Entropy

Supplement: supplementary_material [file attachment]

Entropy of Layer 4 / (7)

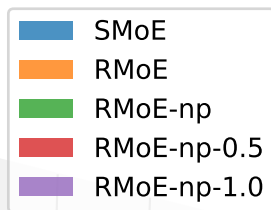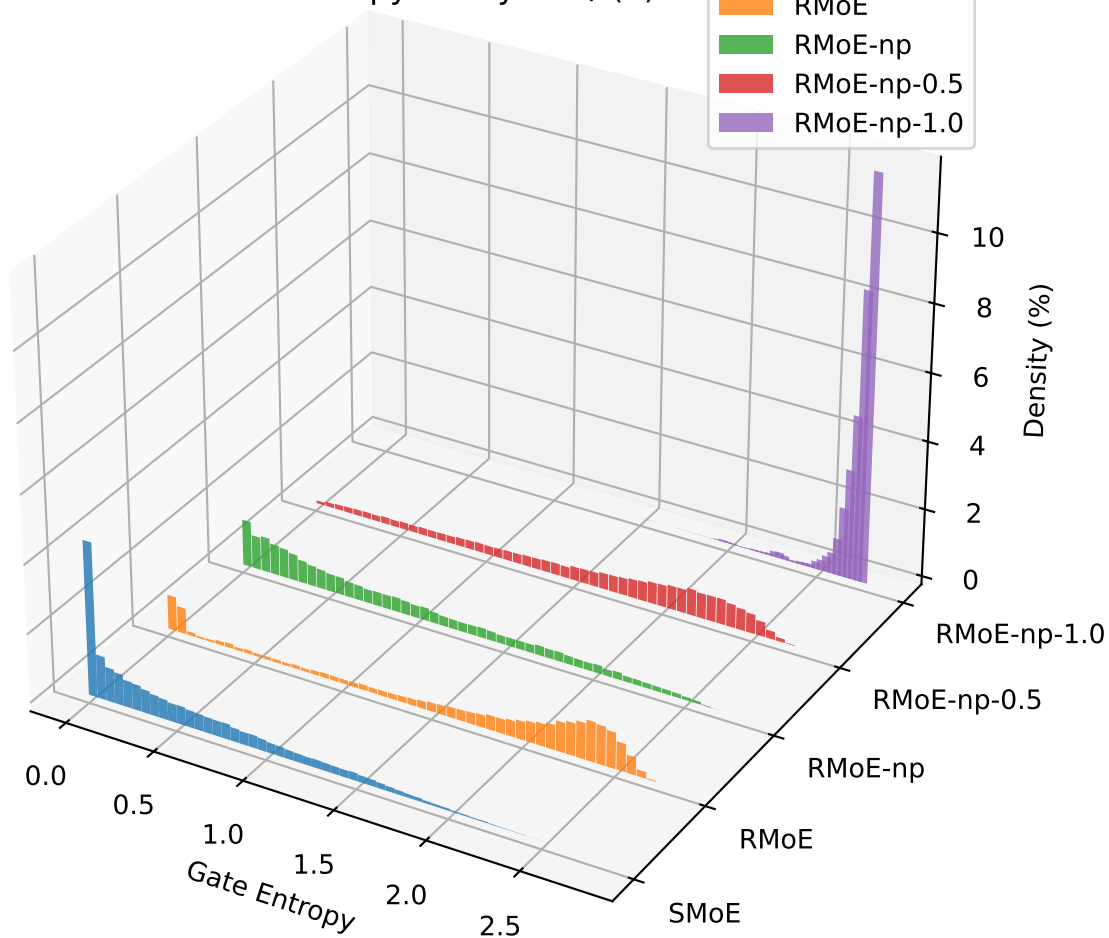

Supplement: supplementary_material [file attachment]

Entropy of Layer 3 / (7)

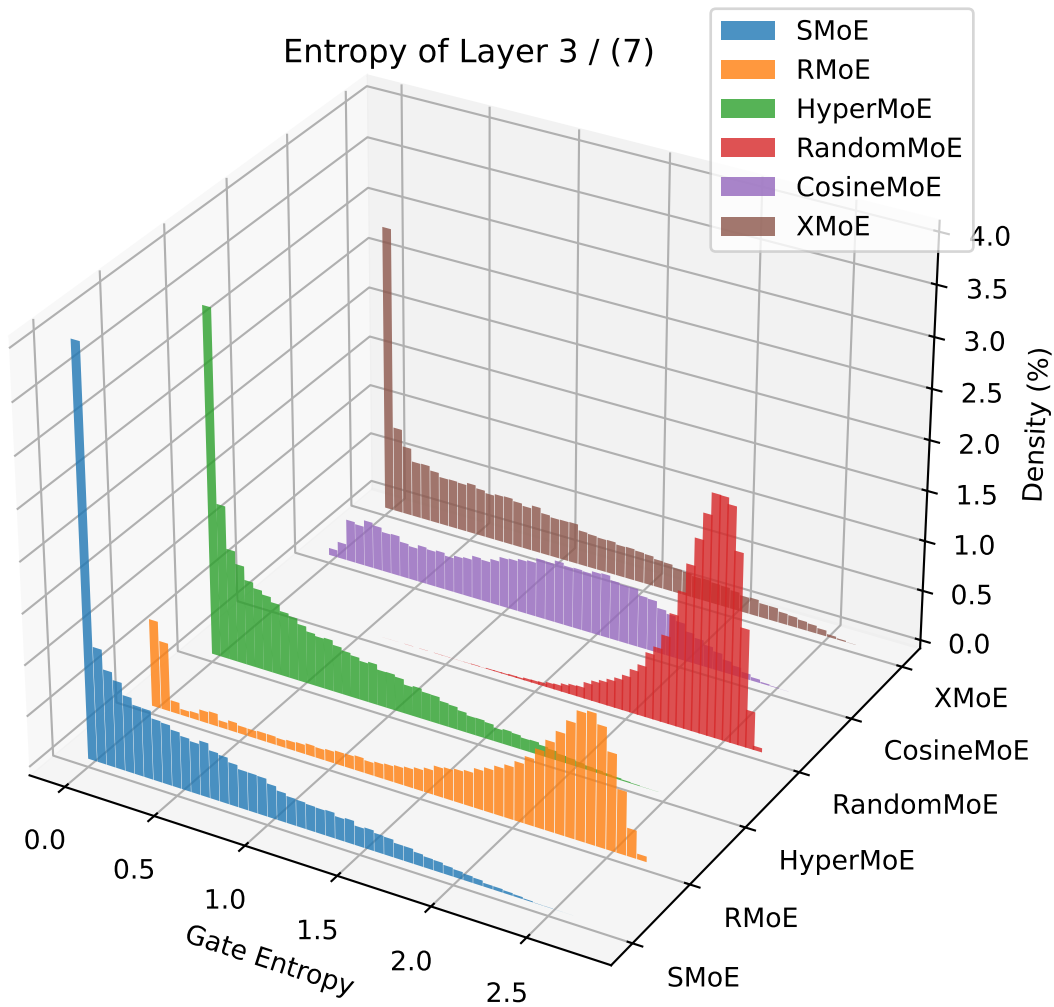

Supplement: supplementary_material [file attachment]

Comparison of Expert Similarities for SMoE and RMoE

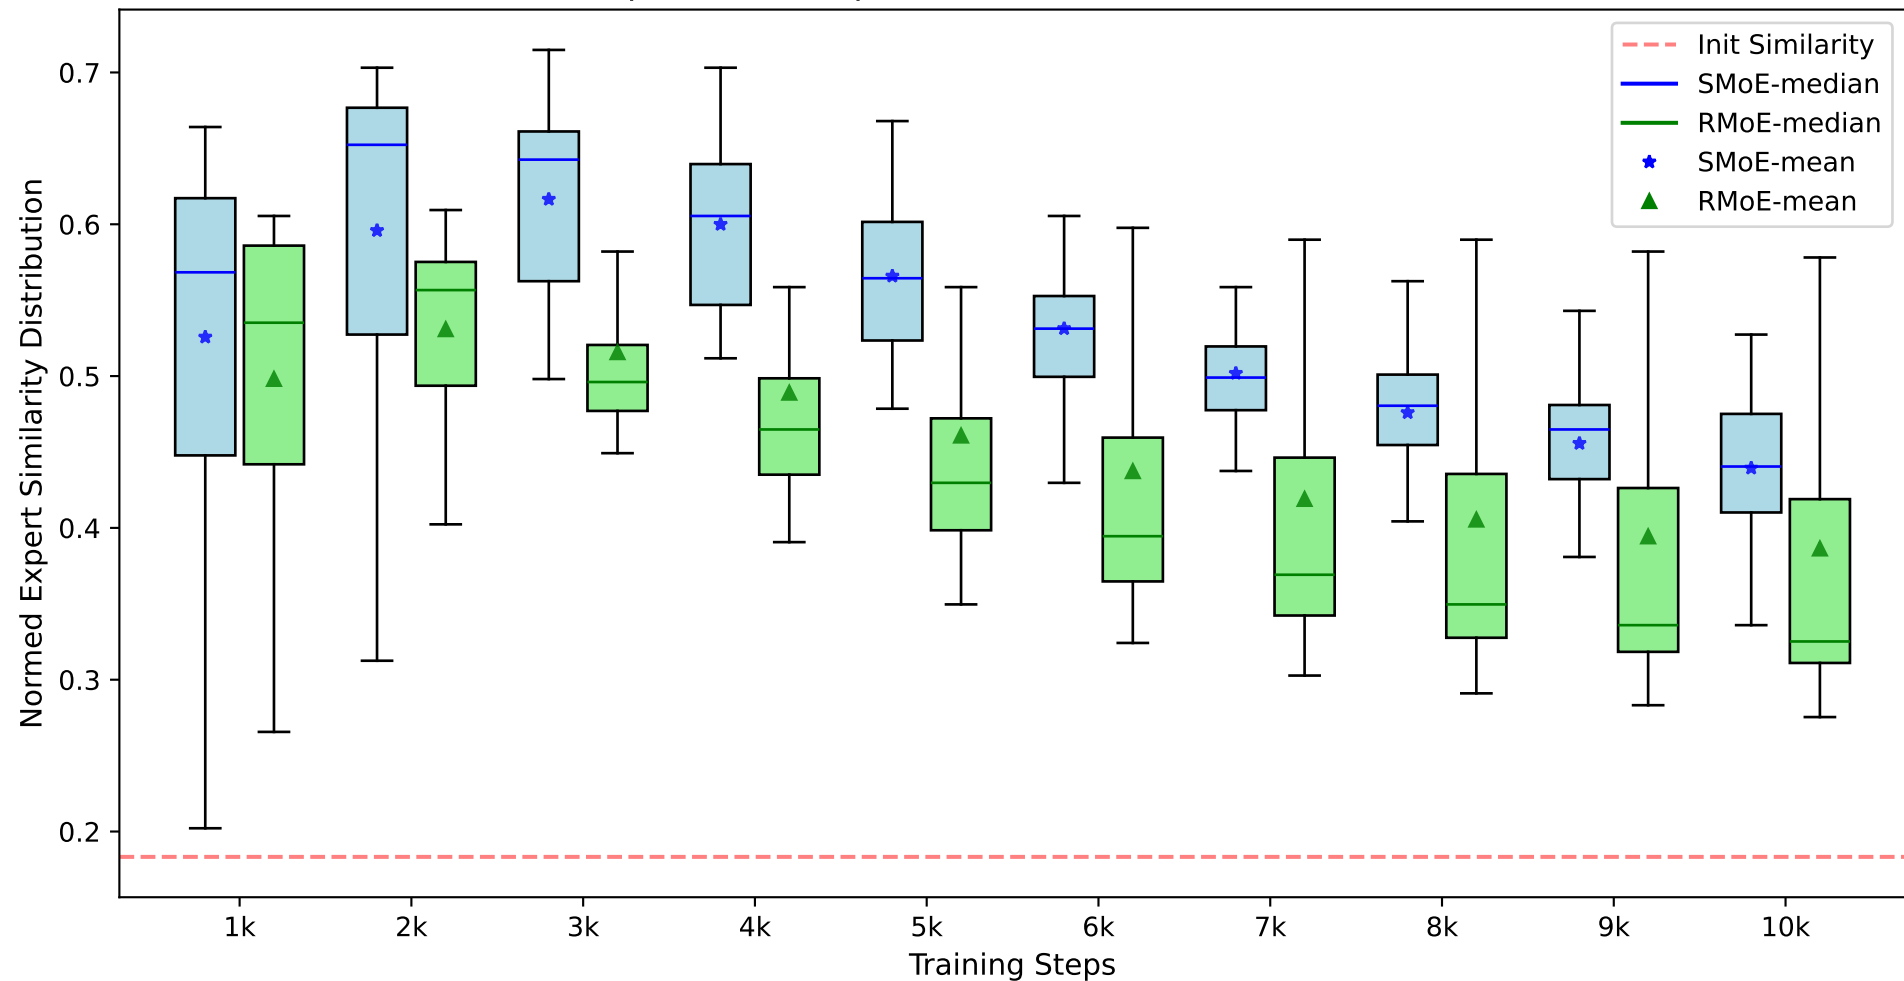

Supplement: supplementary_material [file attachment]

Mean MI of RandomMoE

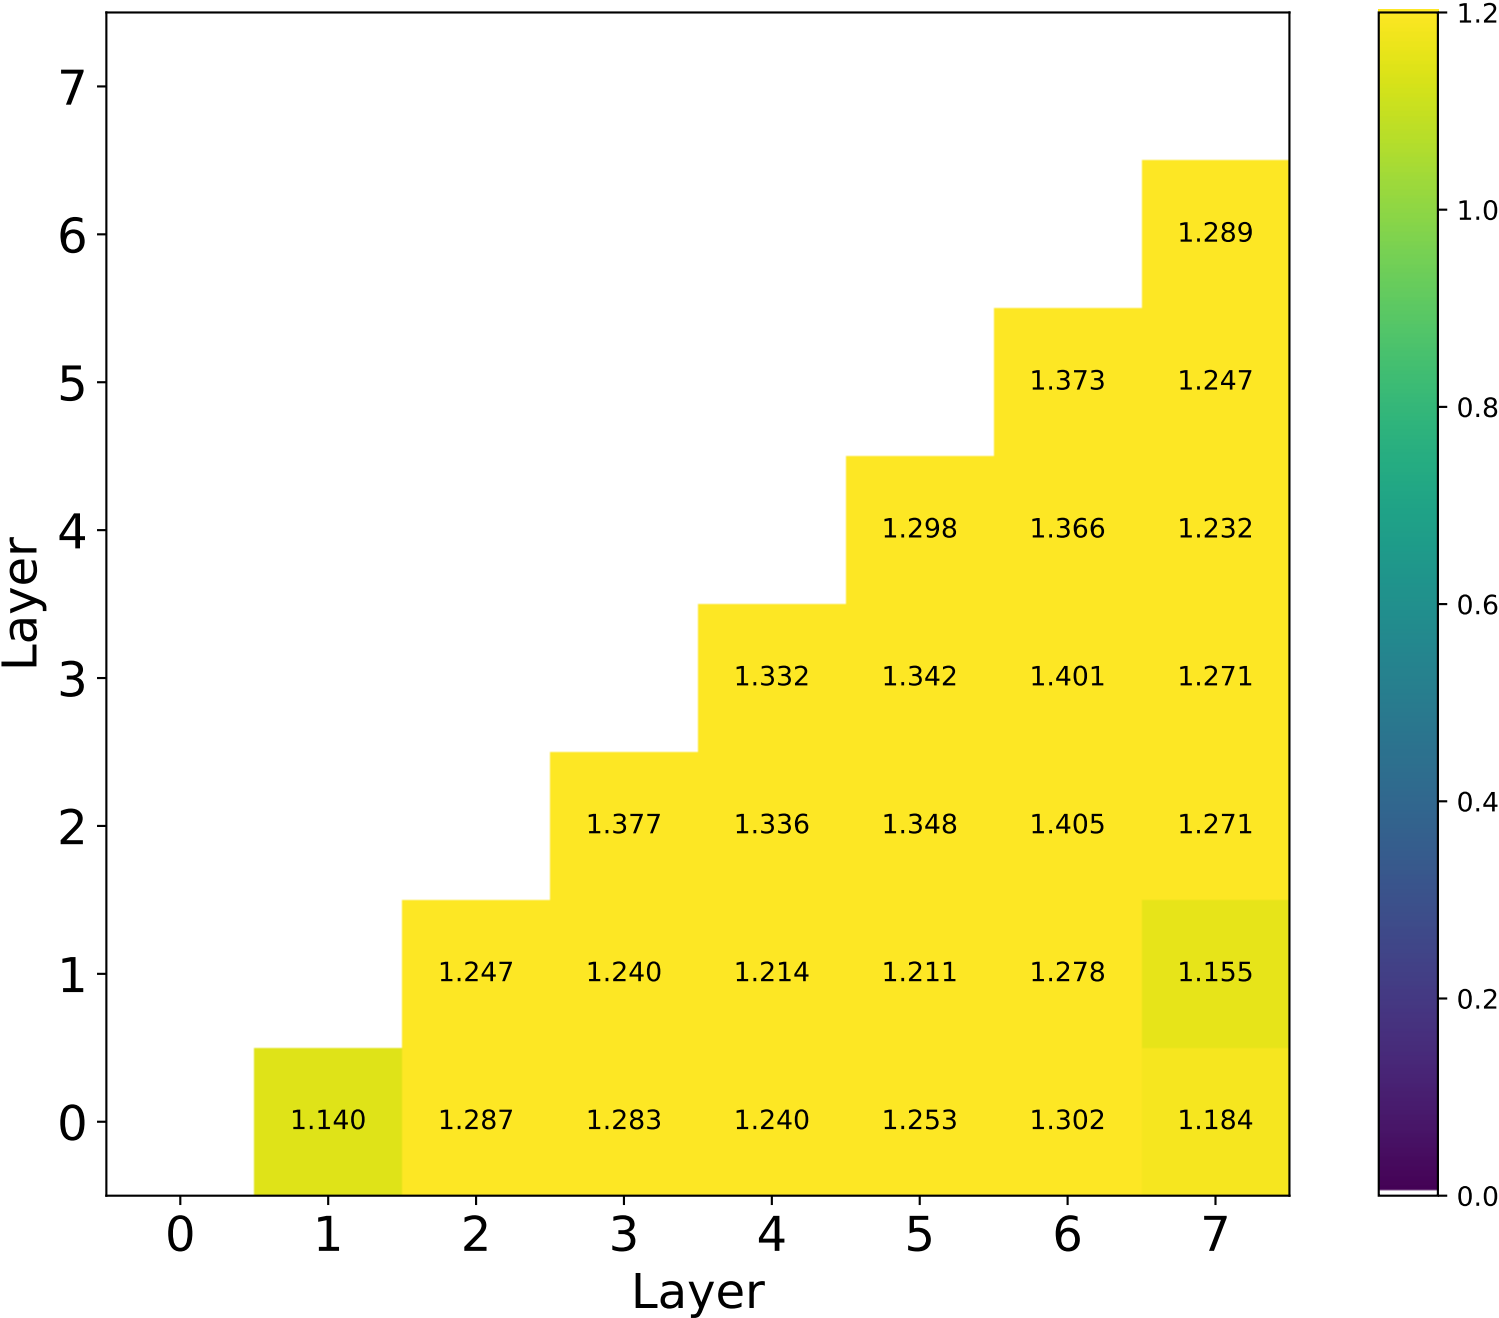

Supplement: supplementary_material [file attachment]

# Mean MI of SMOE

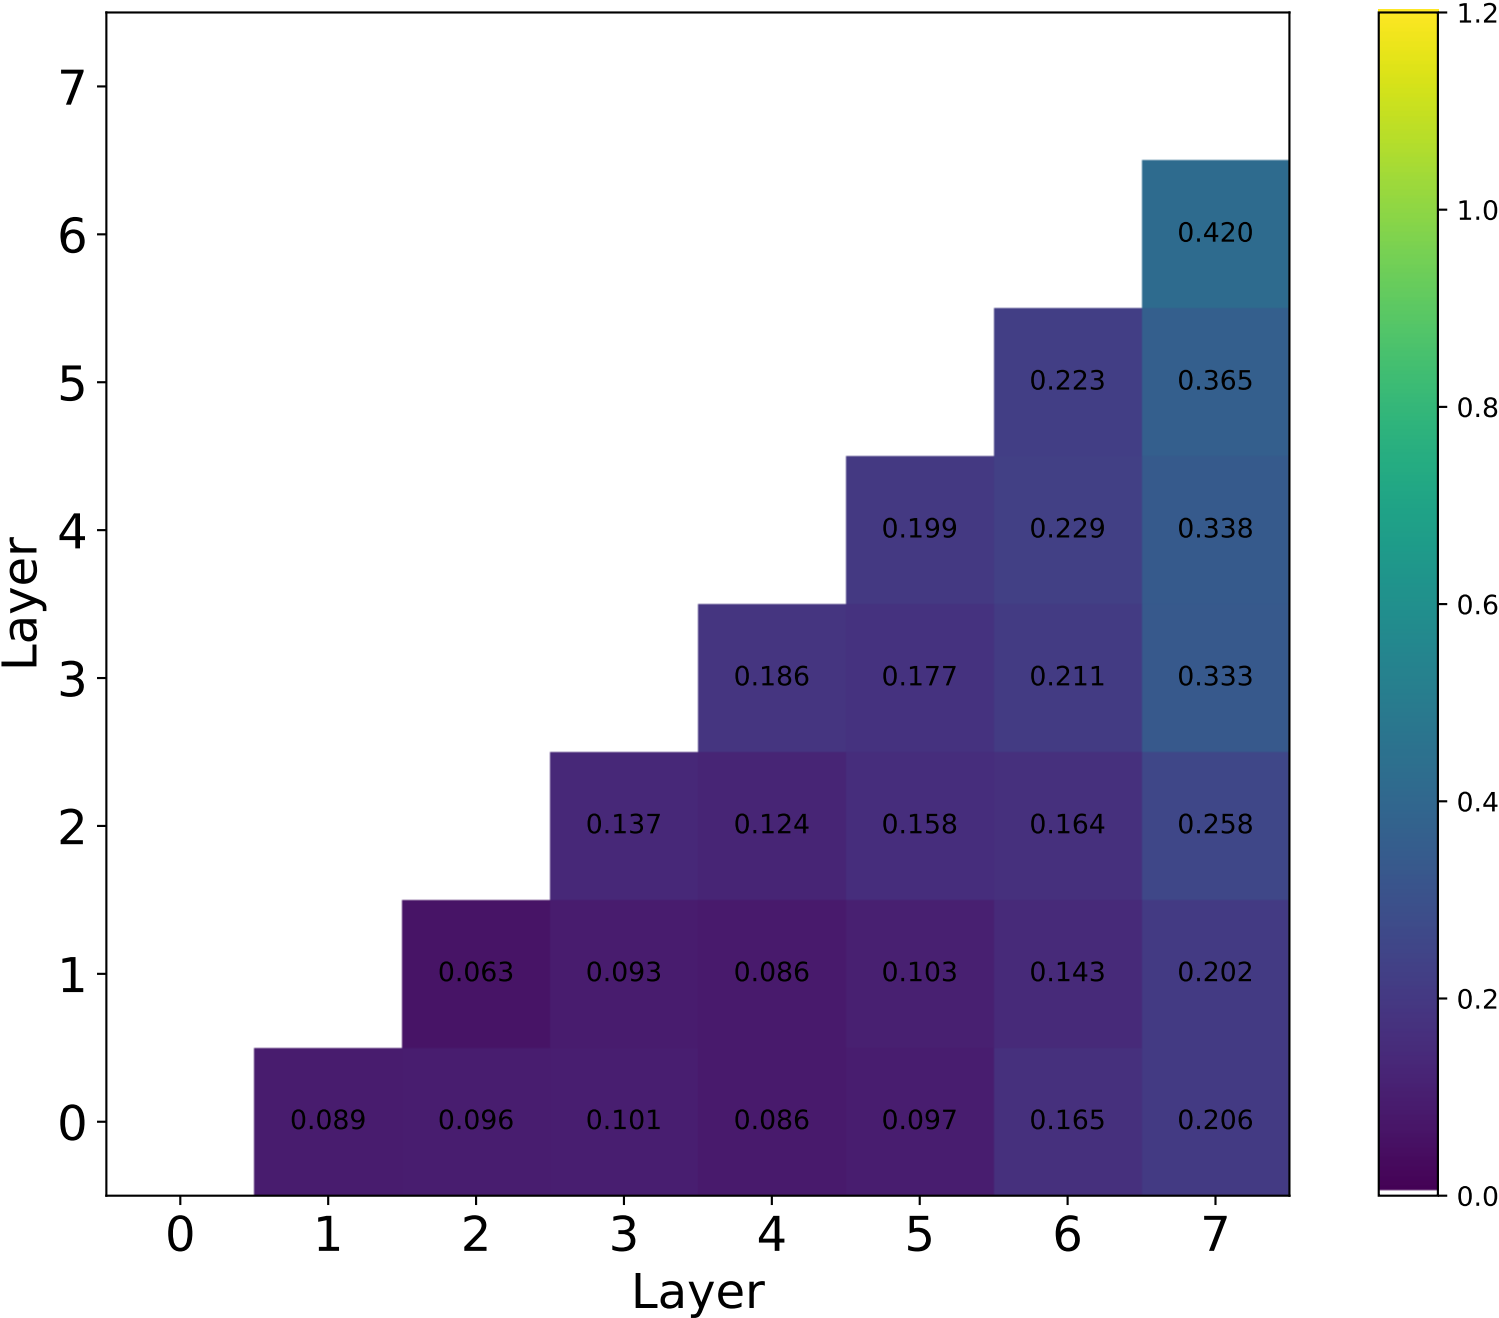

Supplement: supplementary_material [file attachment]

Mean MI of StableMoE

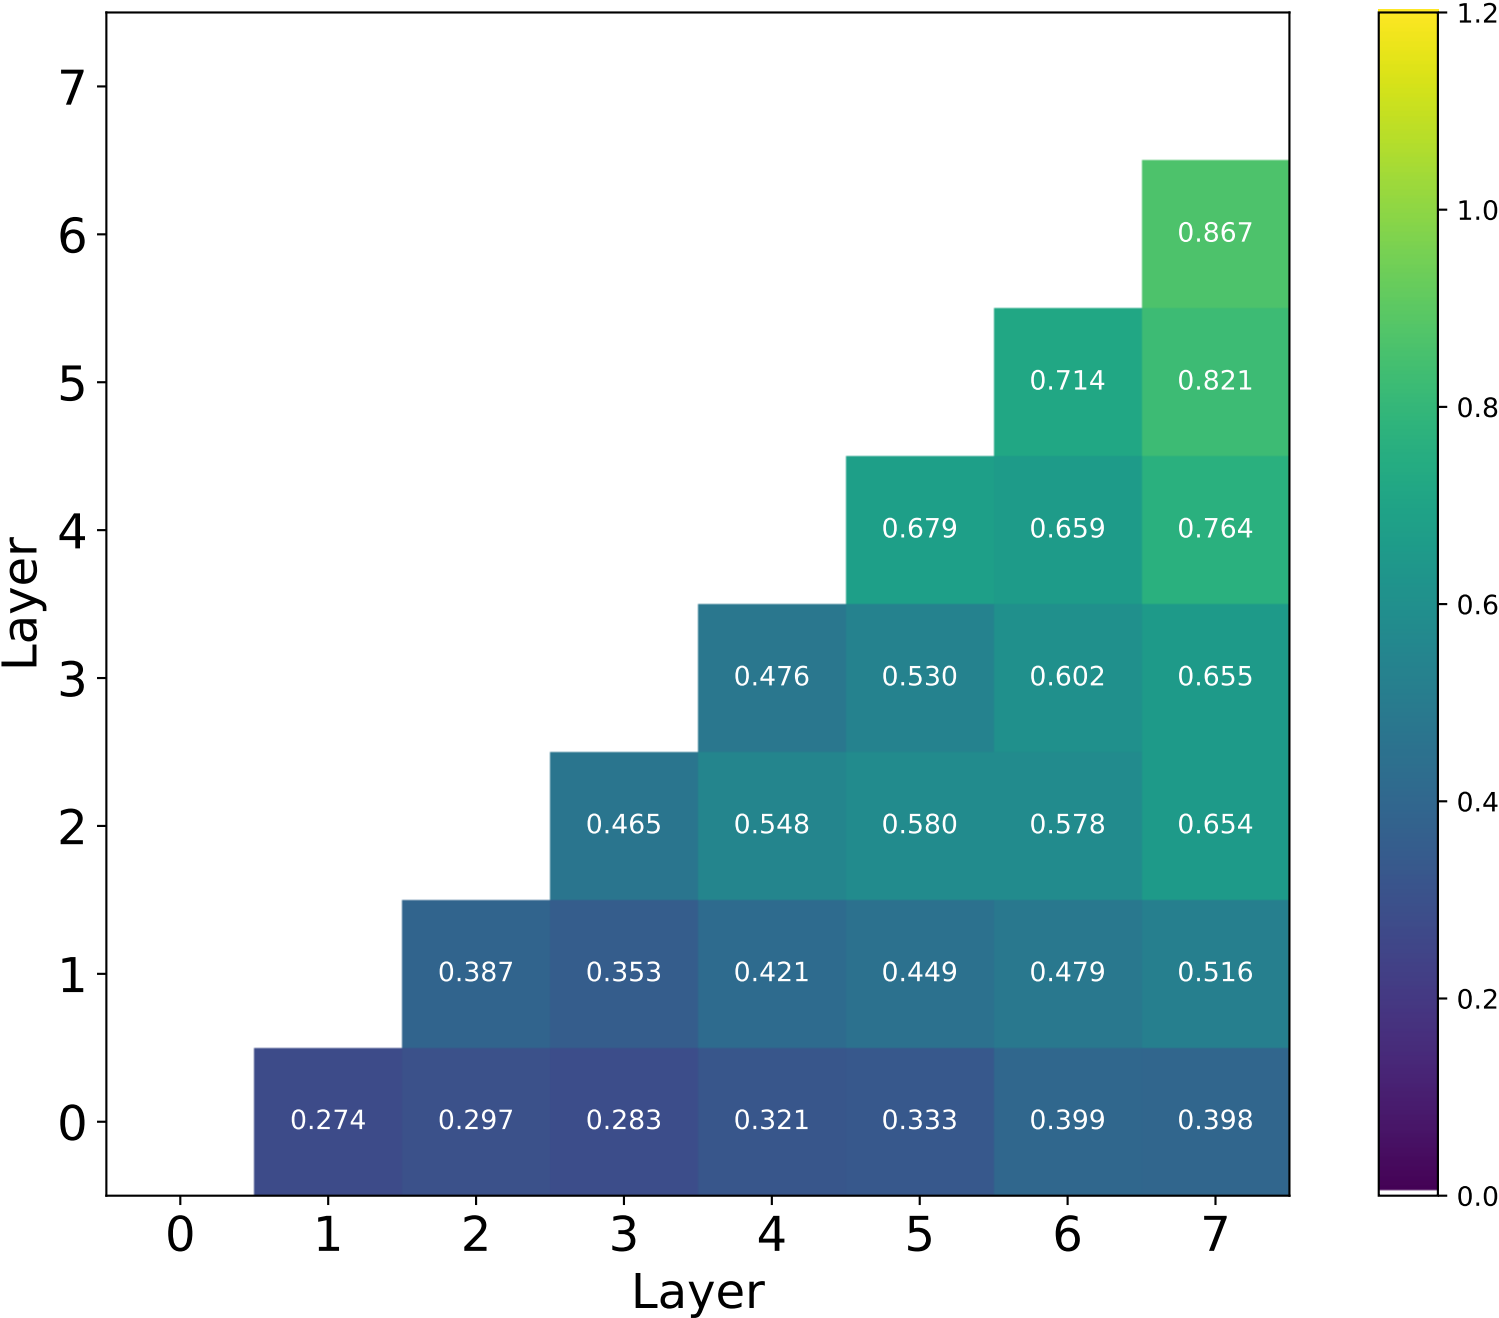

Supplement: supplementary_material [file attachment]

Expert Frequency of RMoE

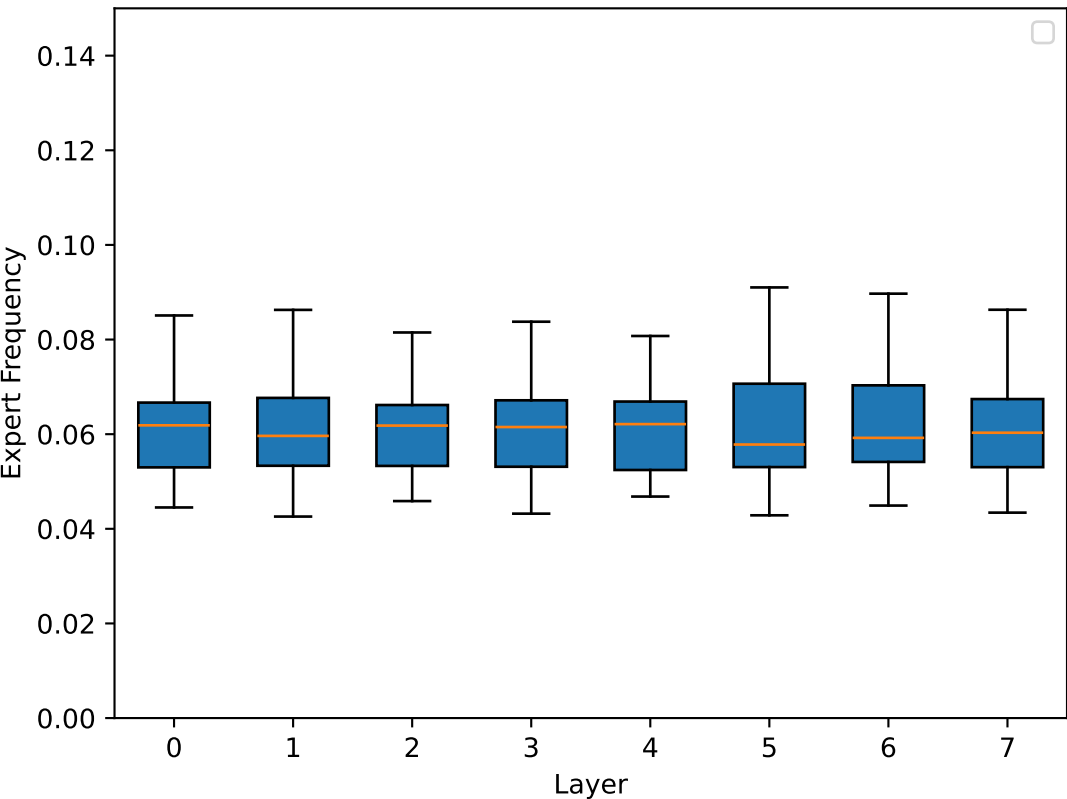

Supplement: supplementary_material [file attachment]

entropy of layer 4

Density k%

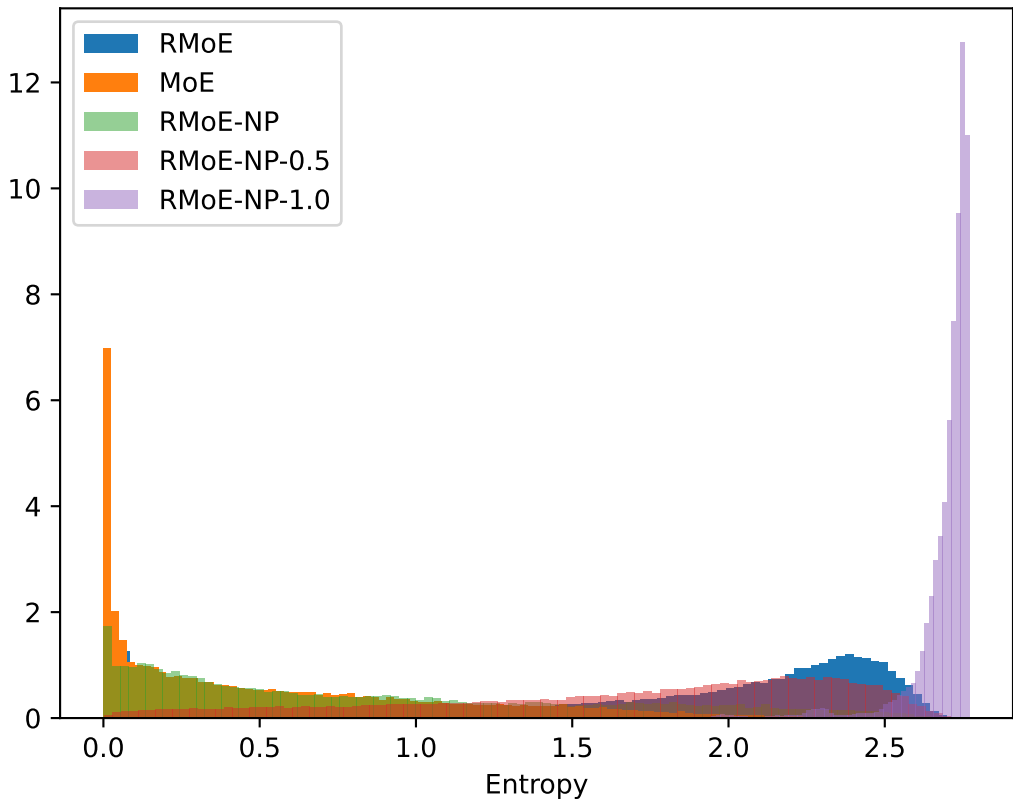

Supplement: supplementary_material [file attachment]

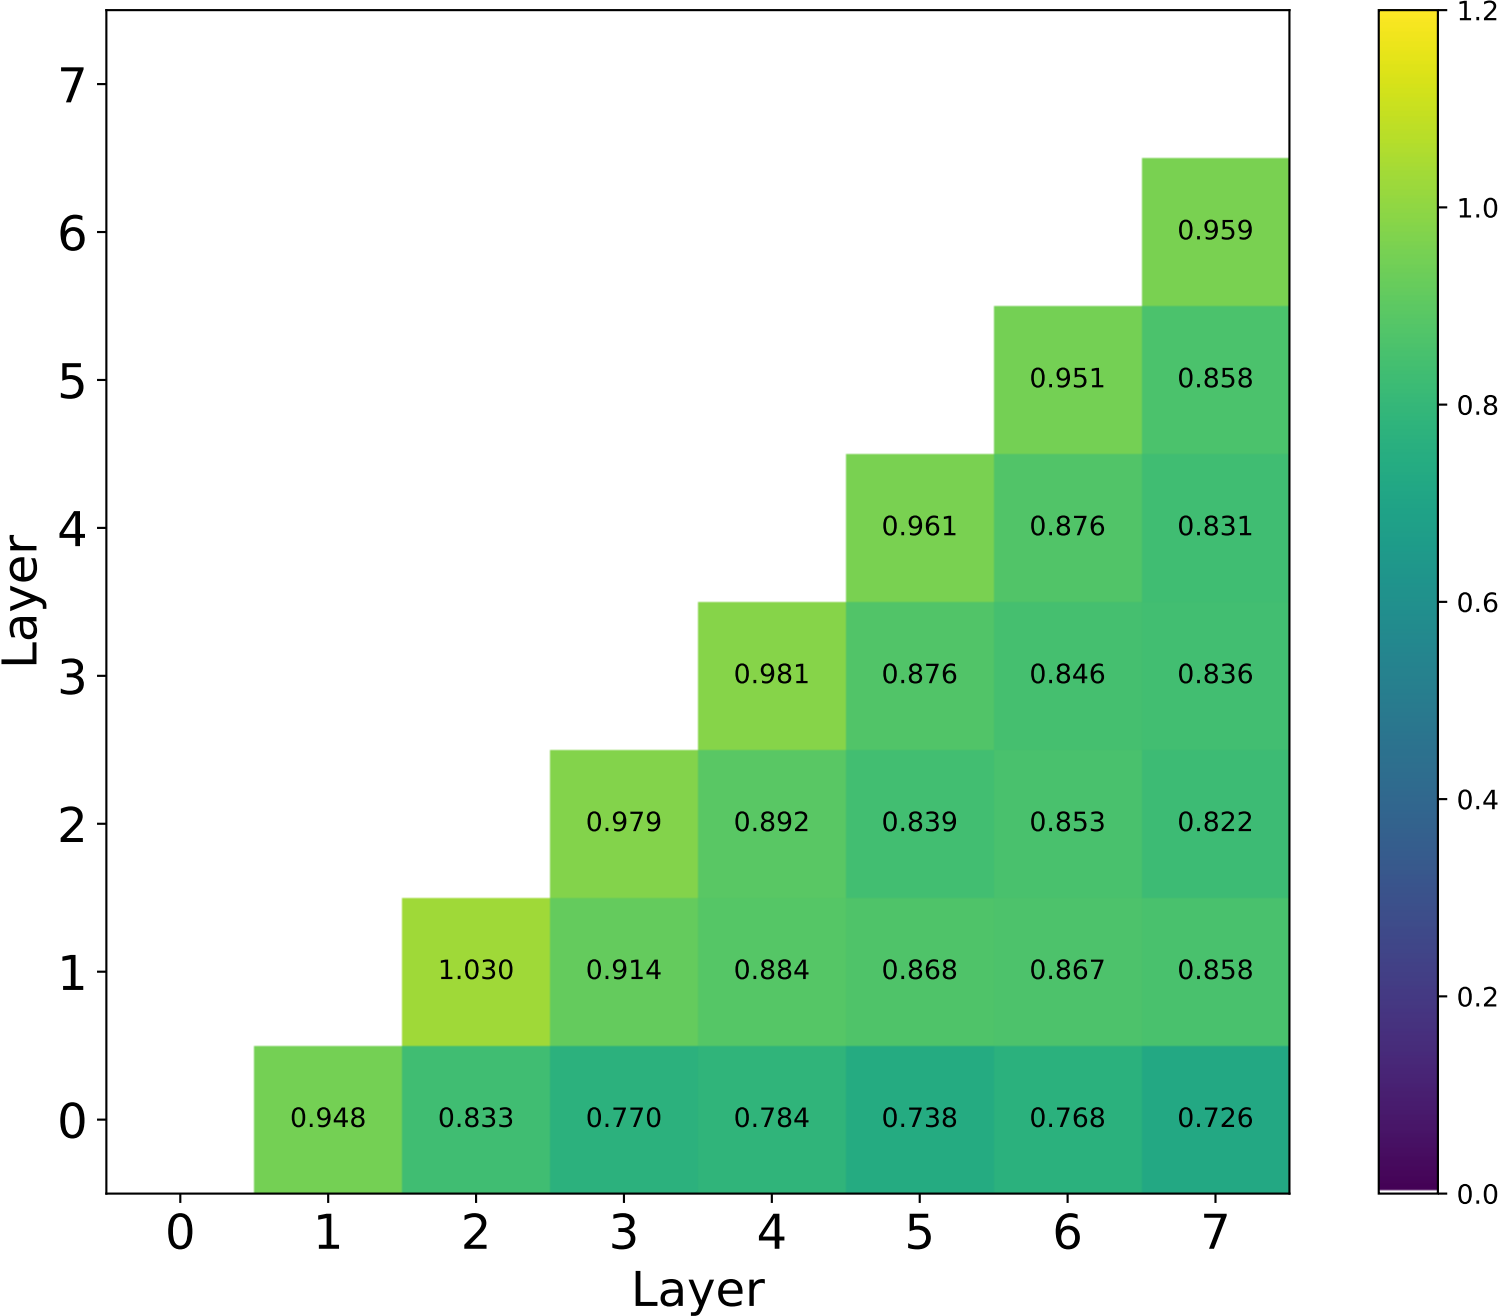

(f) Mean MI of RMoE-NP-r1.0

Supplement: supplementary_material [file attachment]

Expert Frequency of RMoE\_np

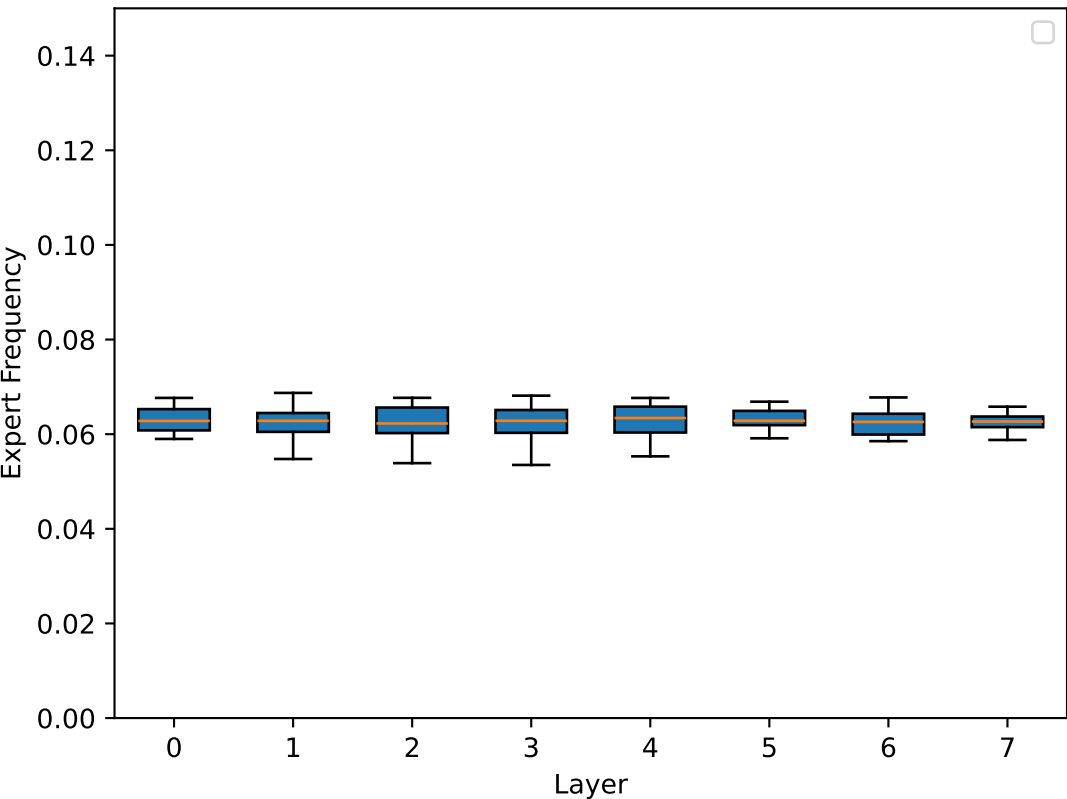

Supplement: supplementary_material [file attachment]

Entropy of Layer 1

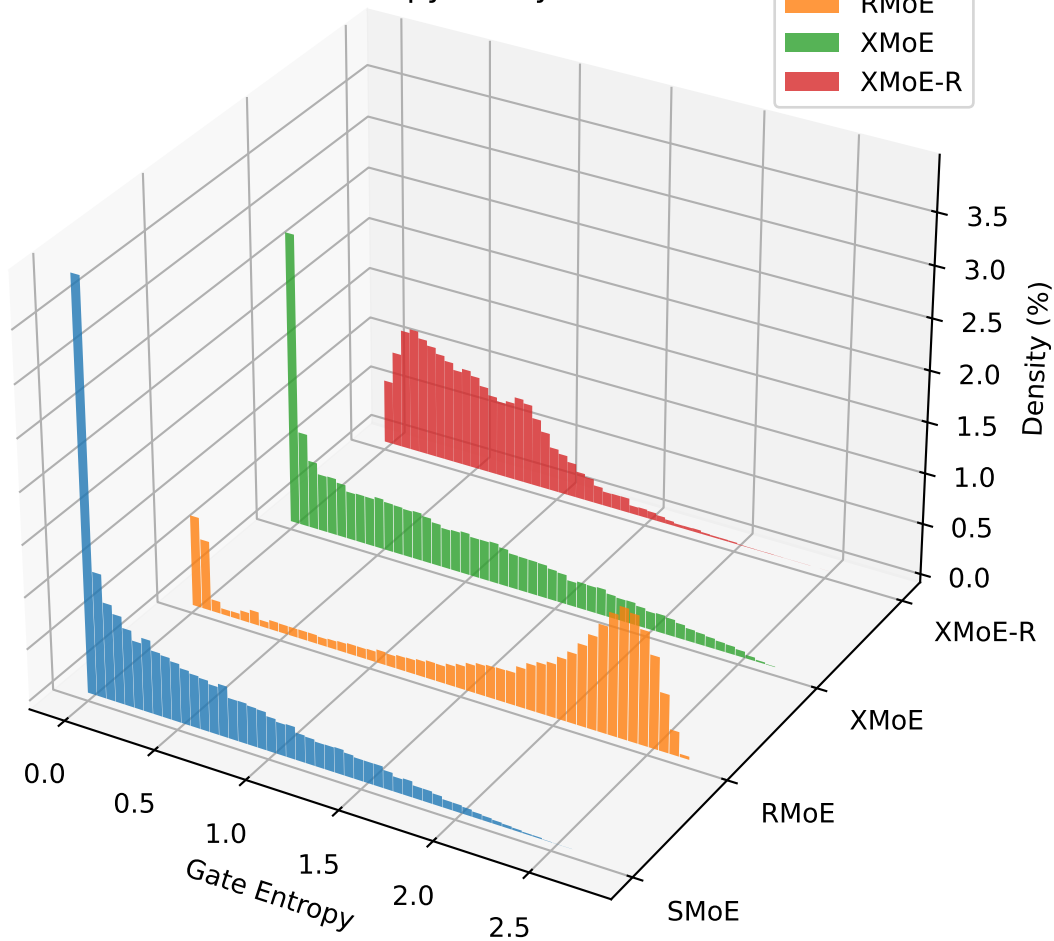

Supplement: supplementary_material [file attachment]

Expert Frequency of RMoE\_np\_1

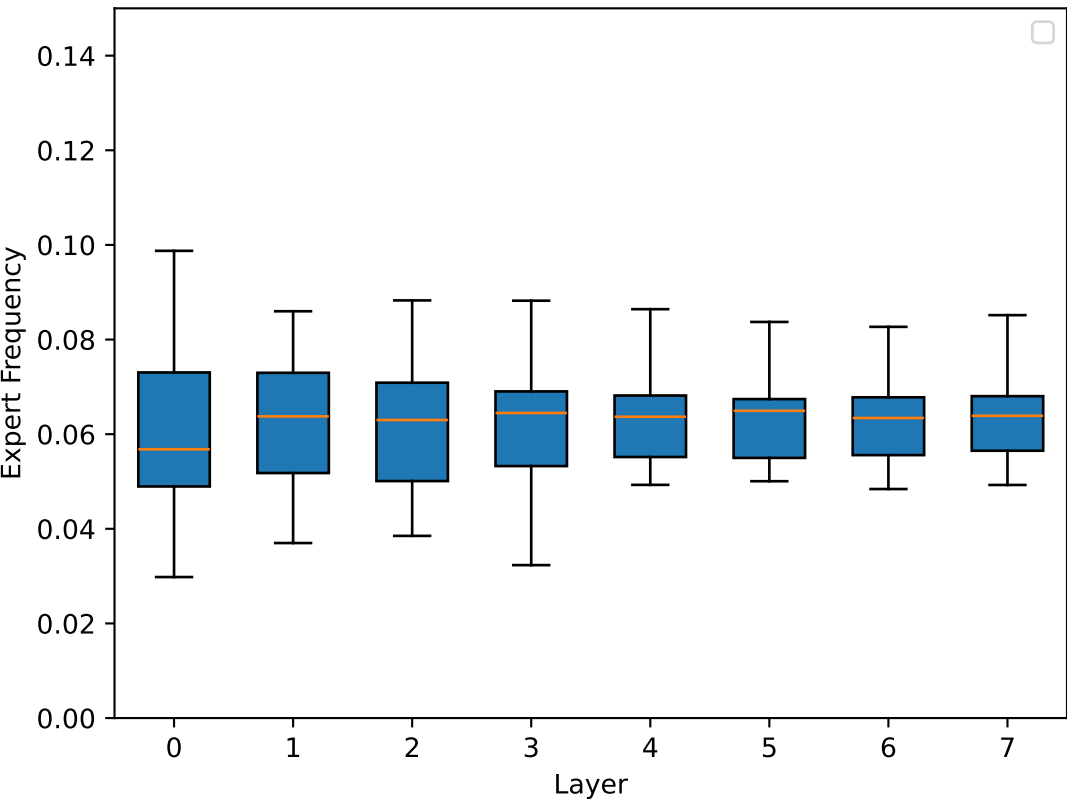

Supplement: supplementary_material [file attachment]

Entropy of Layer 5 / (7)

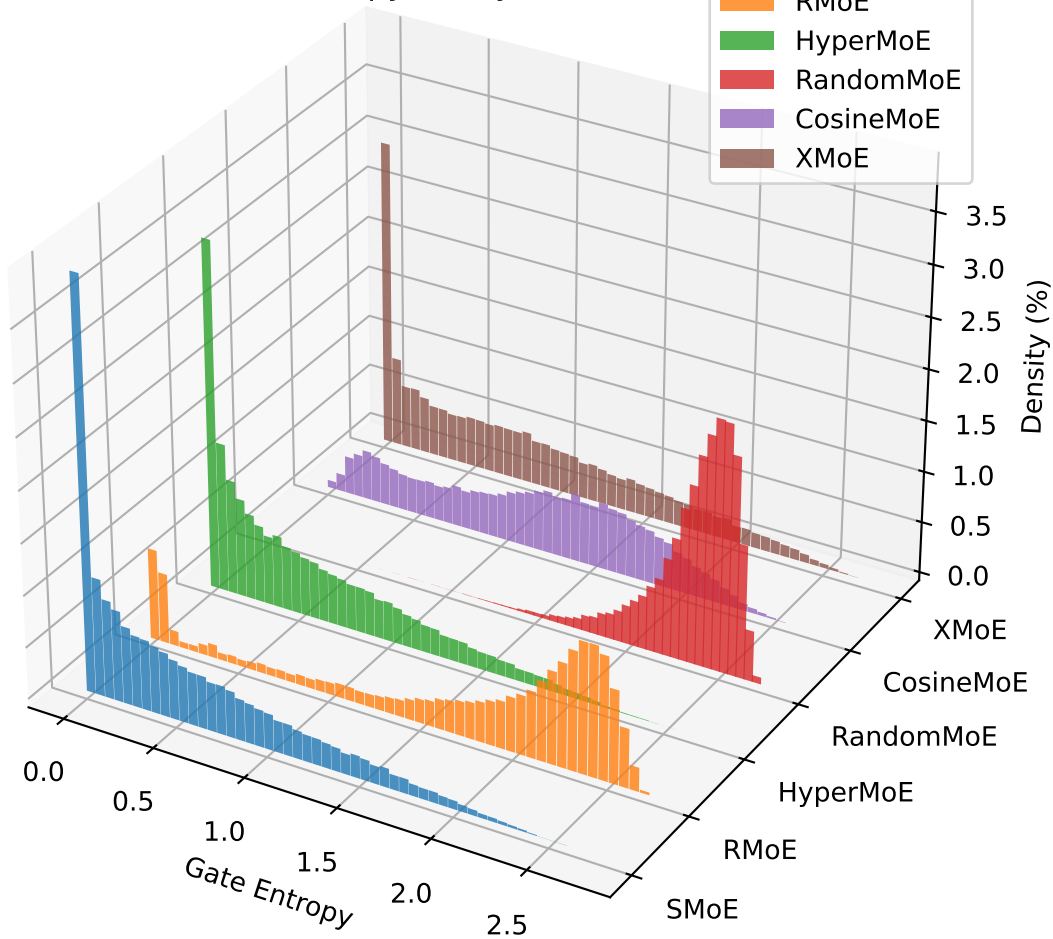

Supplement: supplementary_material [file attachment]

entropy of layer 5

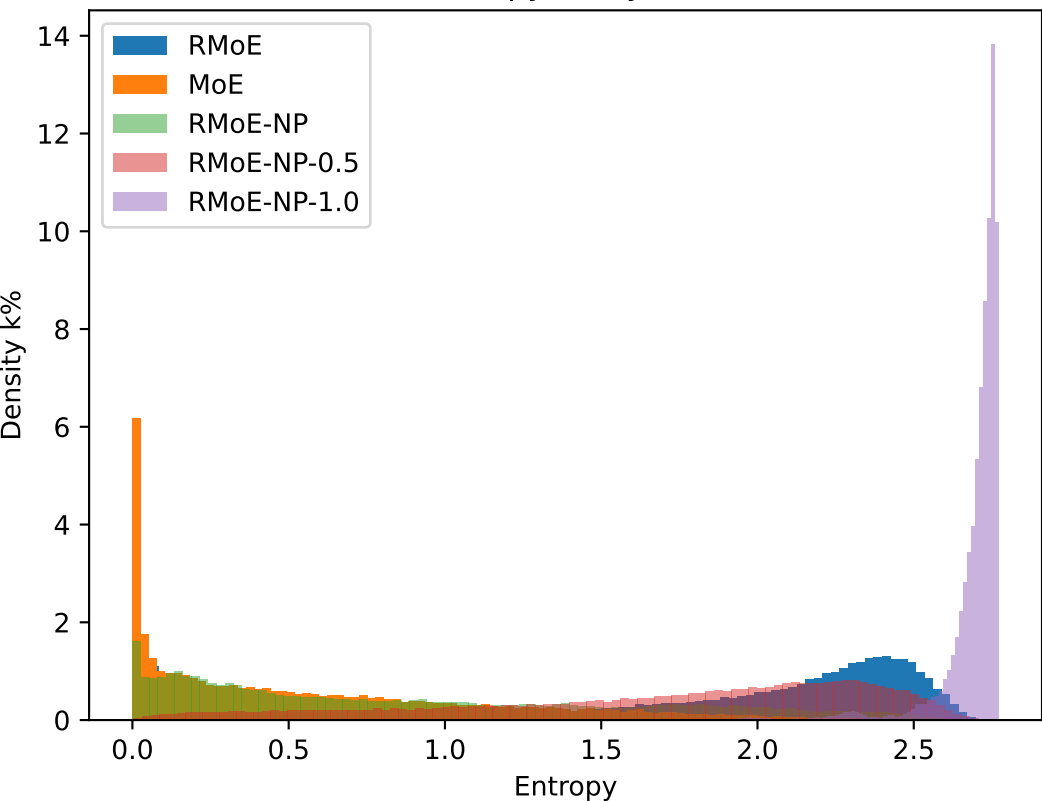

Supplement: supplementary_material [file attachment]

Mean MI of CosineMoE



Supplement: supplementary_material [file attachment]

Comparison of Router Norms for SMoE and RMoE

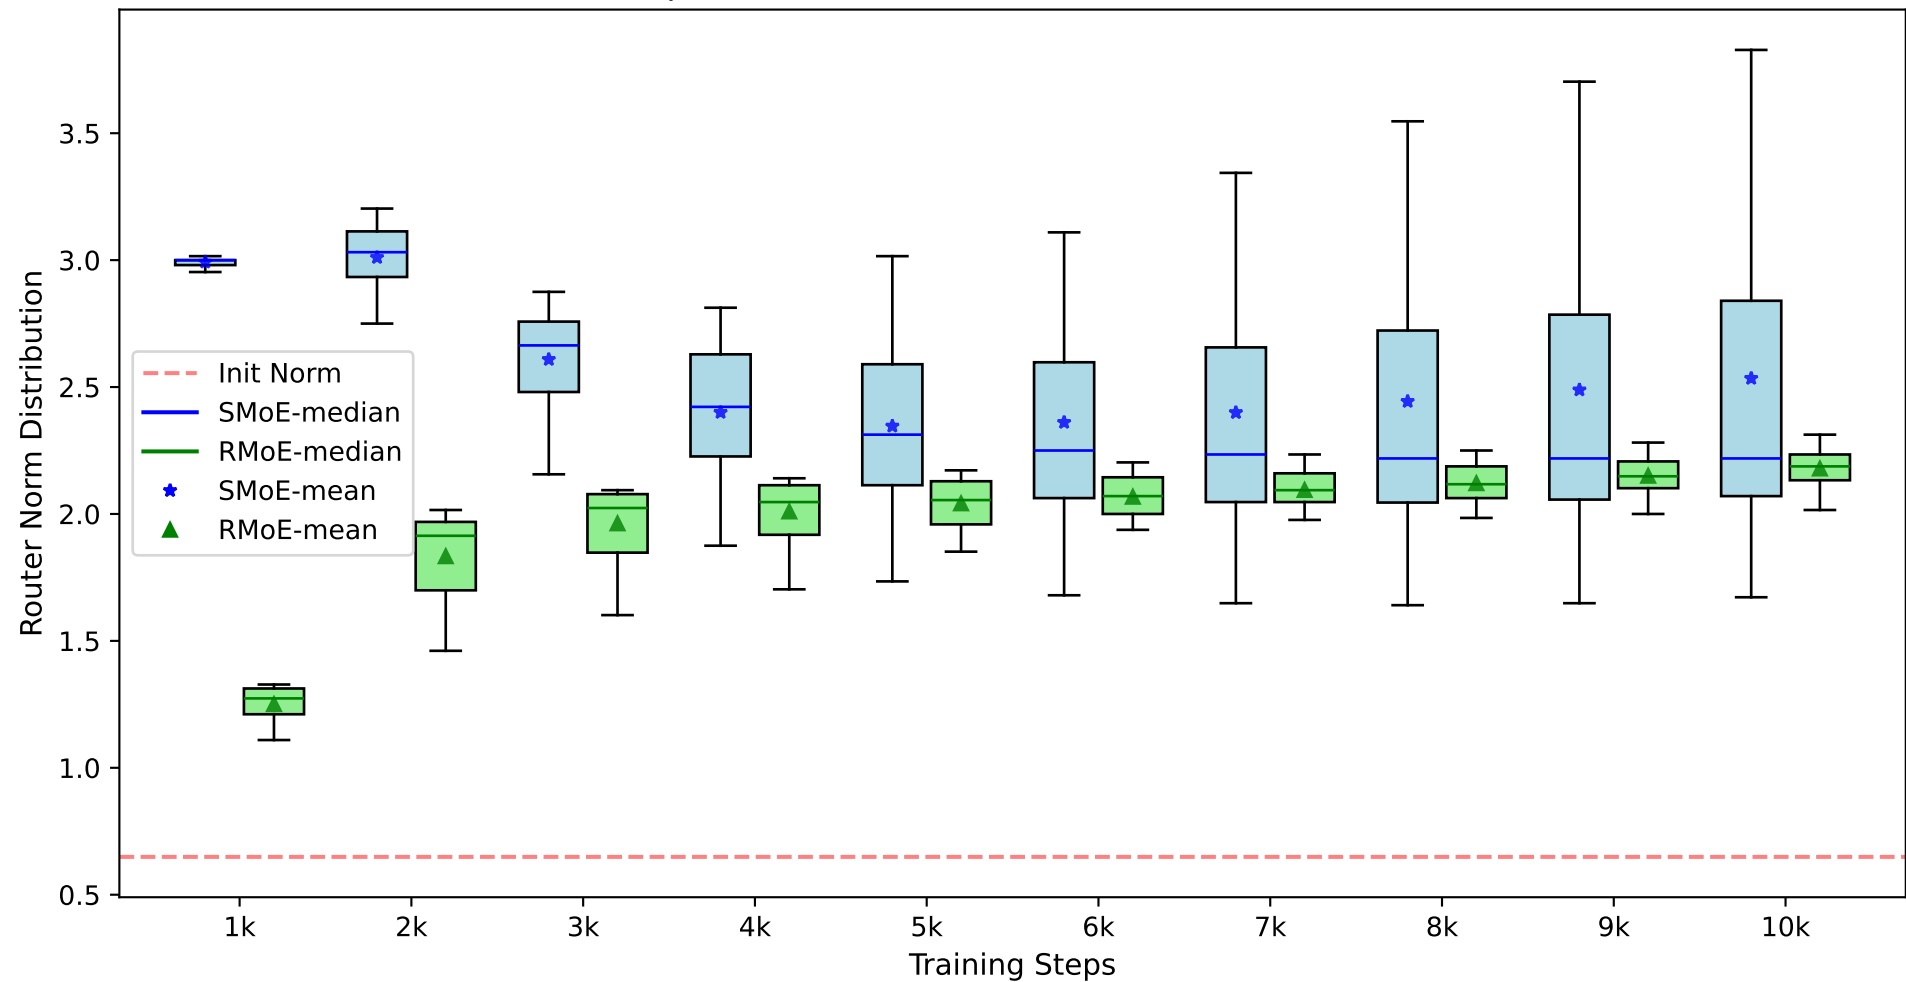

Supplement: supplementary_material [file attachment]

entropy of layer 7

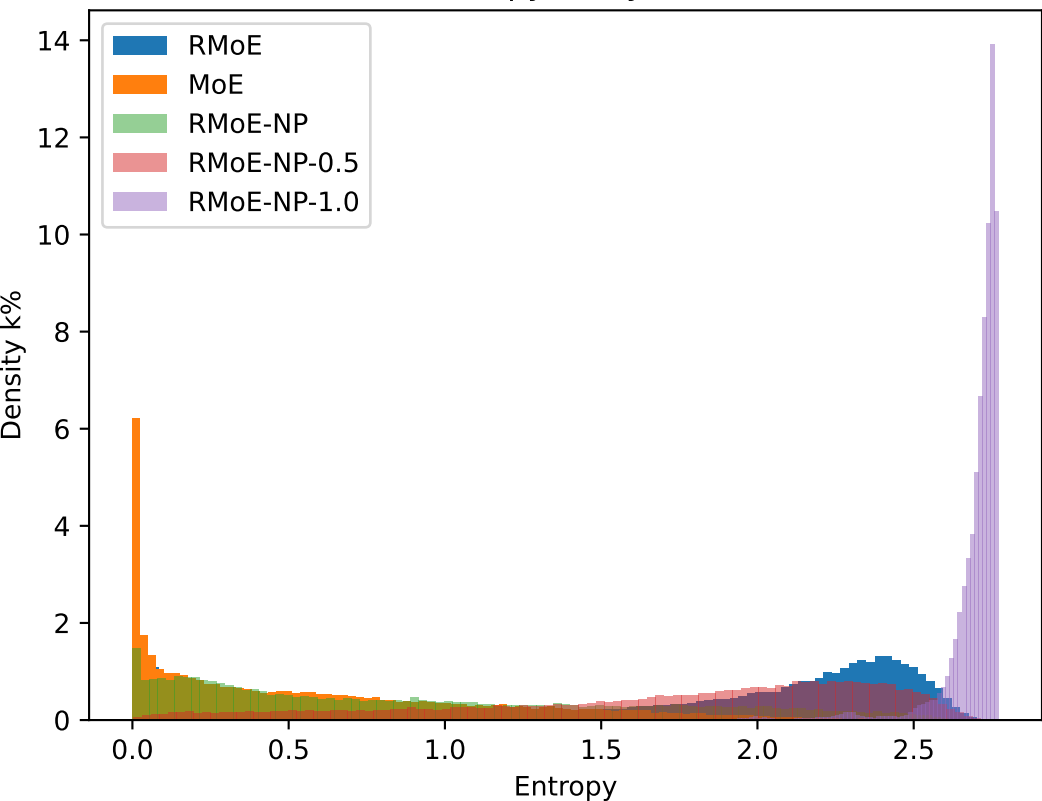

Supplement: supplementary_material [file attachment]

Entropy of Layer 5 / (7)

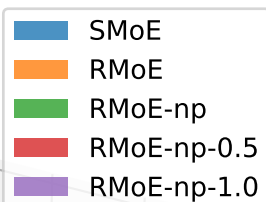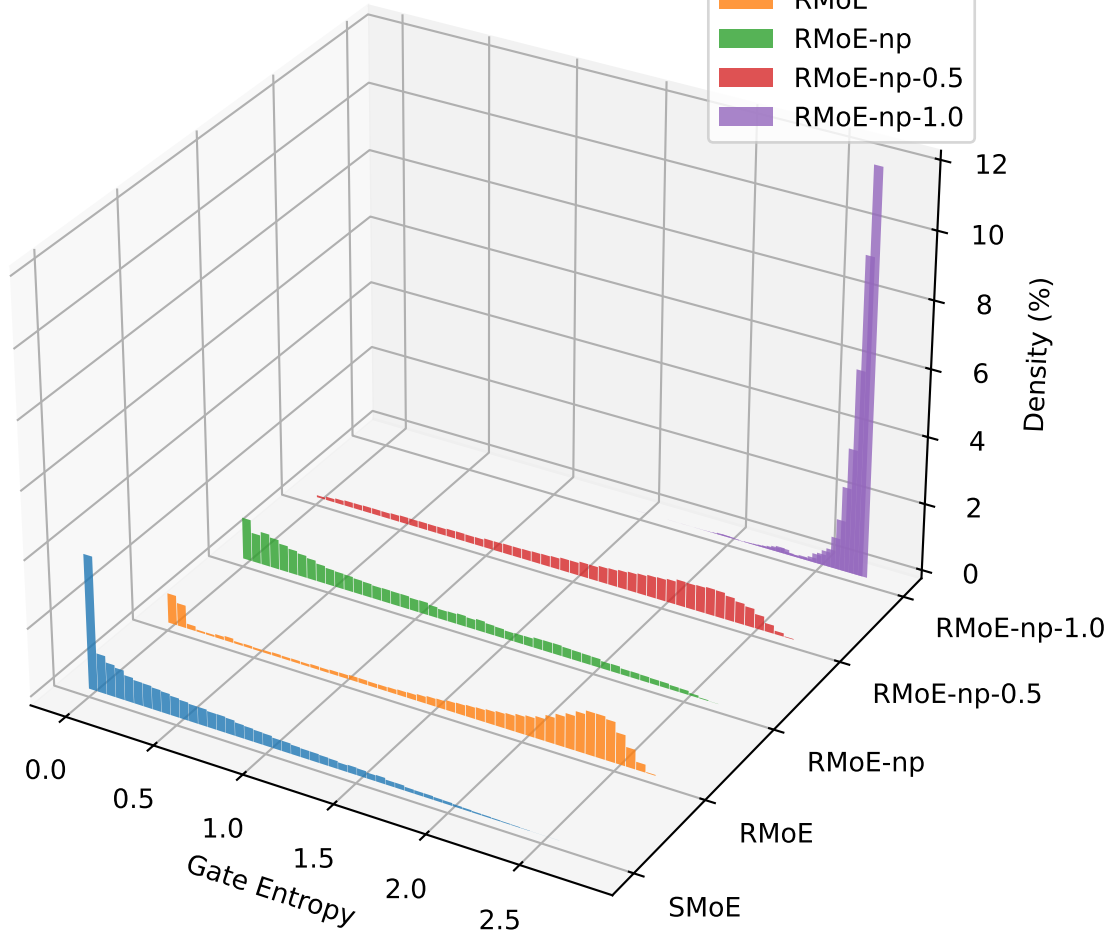

Supplement: supplementary_material [file attachment]

Entropy of Layer 1 / (7)

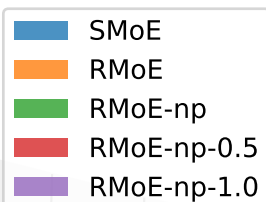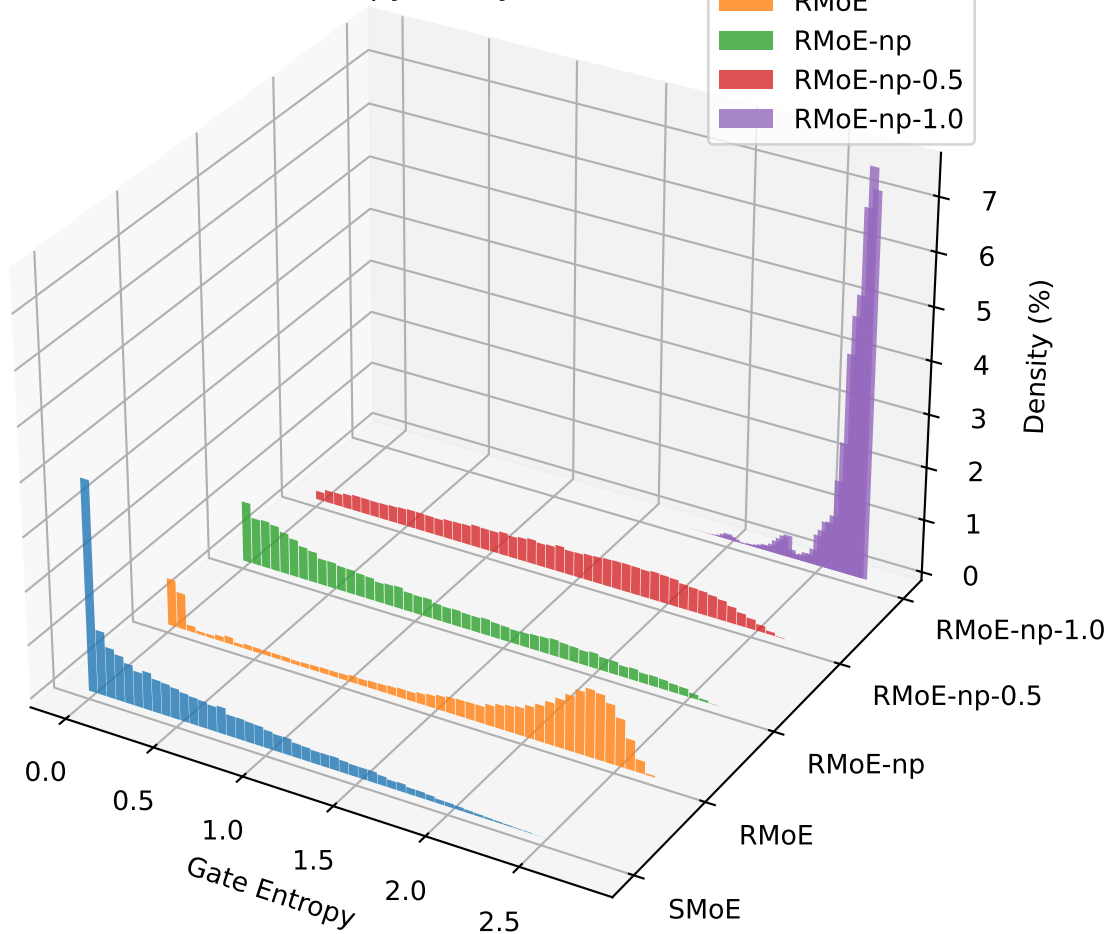

Supplement: supplementary_material [file attachment]

Expert Frequency of XMoE

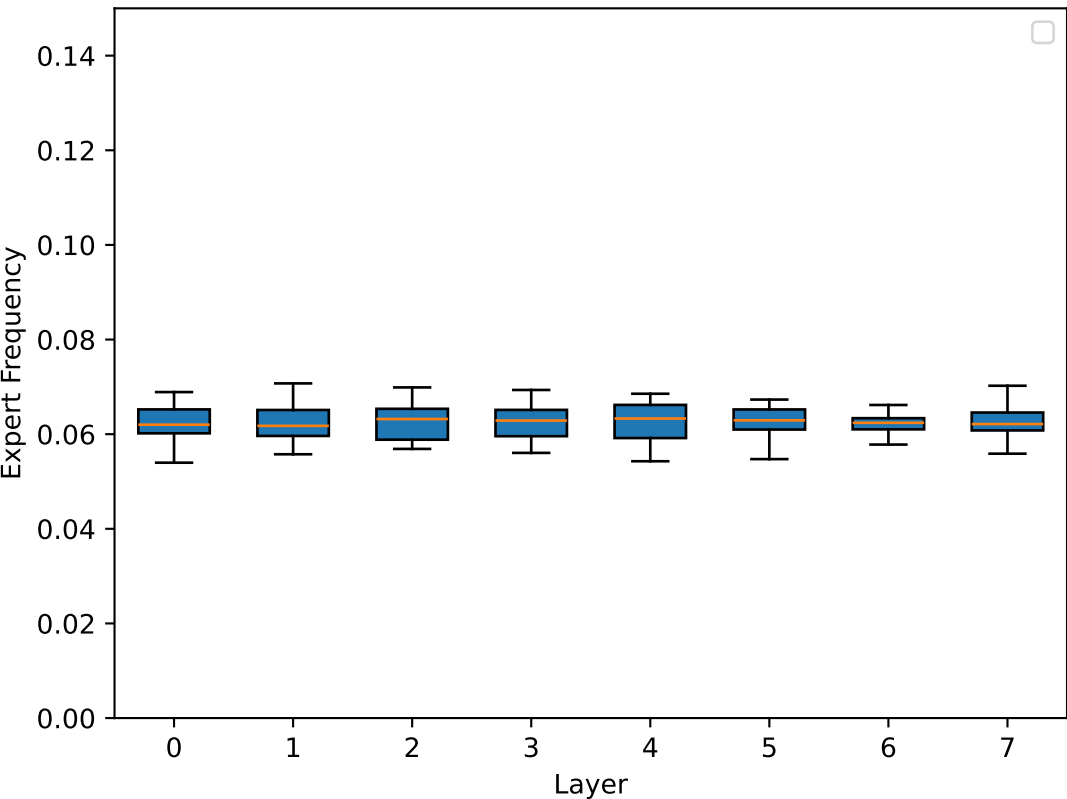

Supplement: supplementary_material [file attachment]

Entropy of Layer 7 / (7)

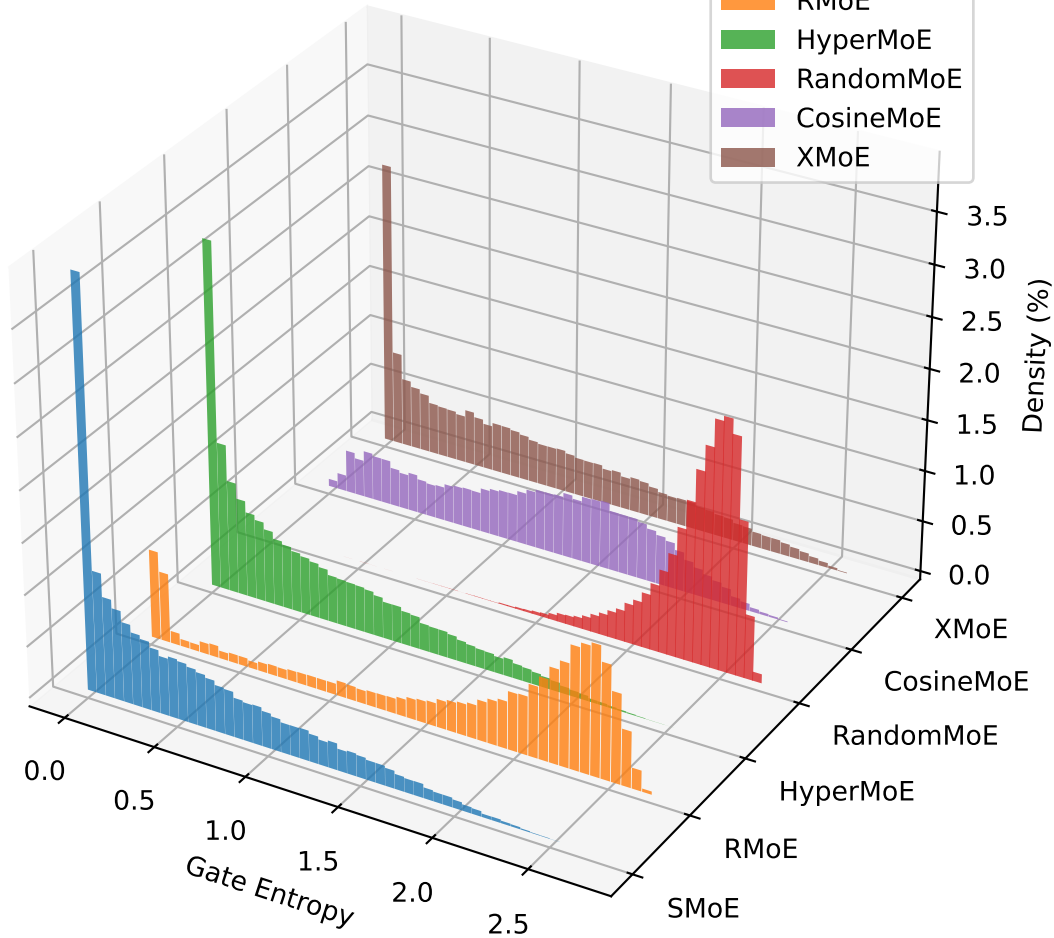

Supplement: supplementary_material [file attachment]

Entropy of Layer 0

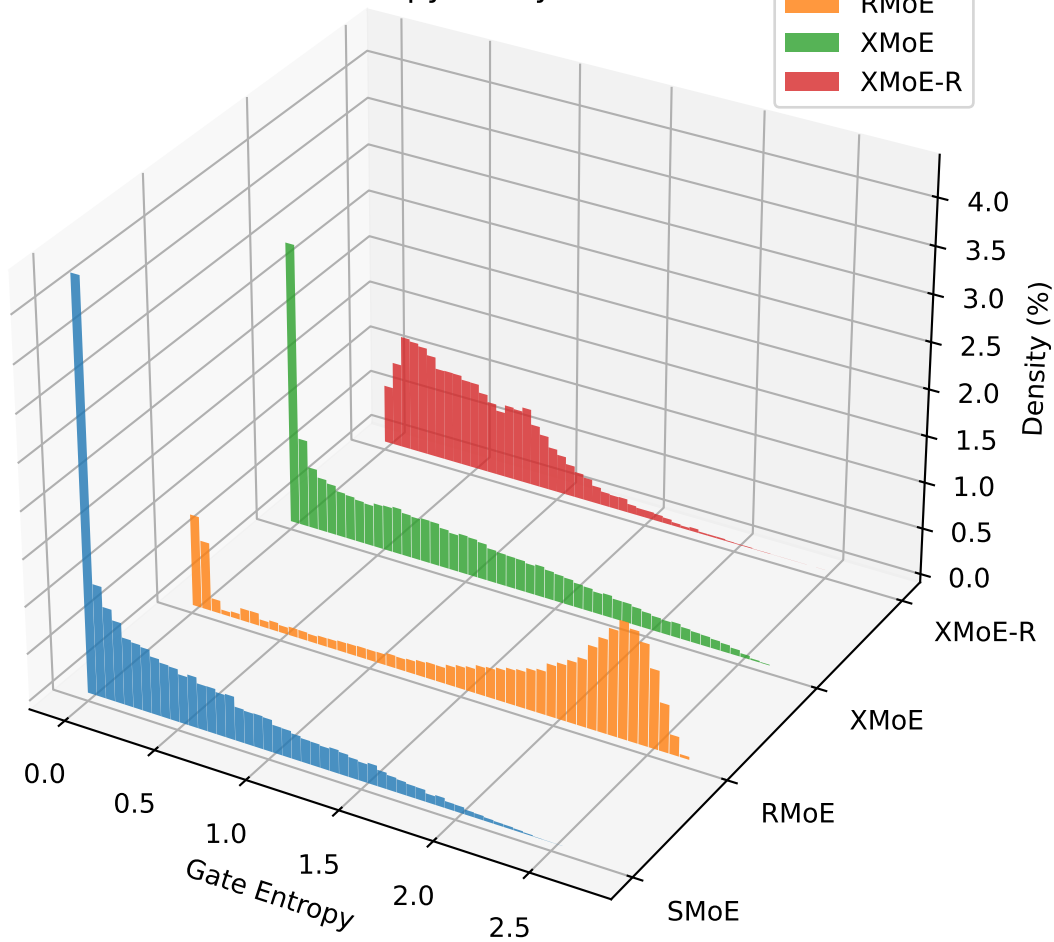

Supplement: supplementary_material [file attachment]

Entropy of Layer 6 / (7)

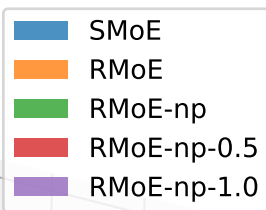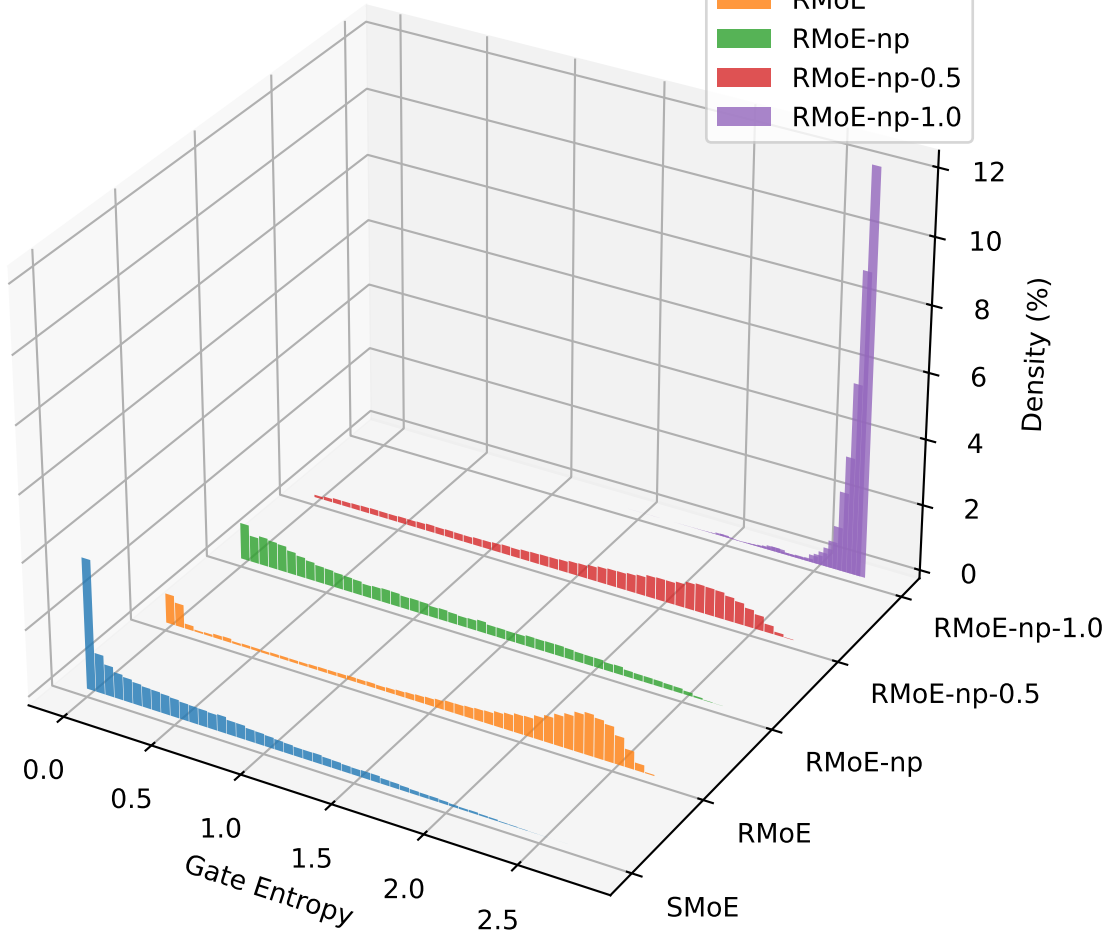

Supplement: supplementary_material [file attachment]

Entropy of Layer 6

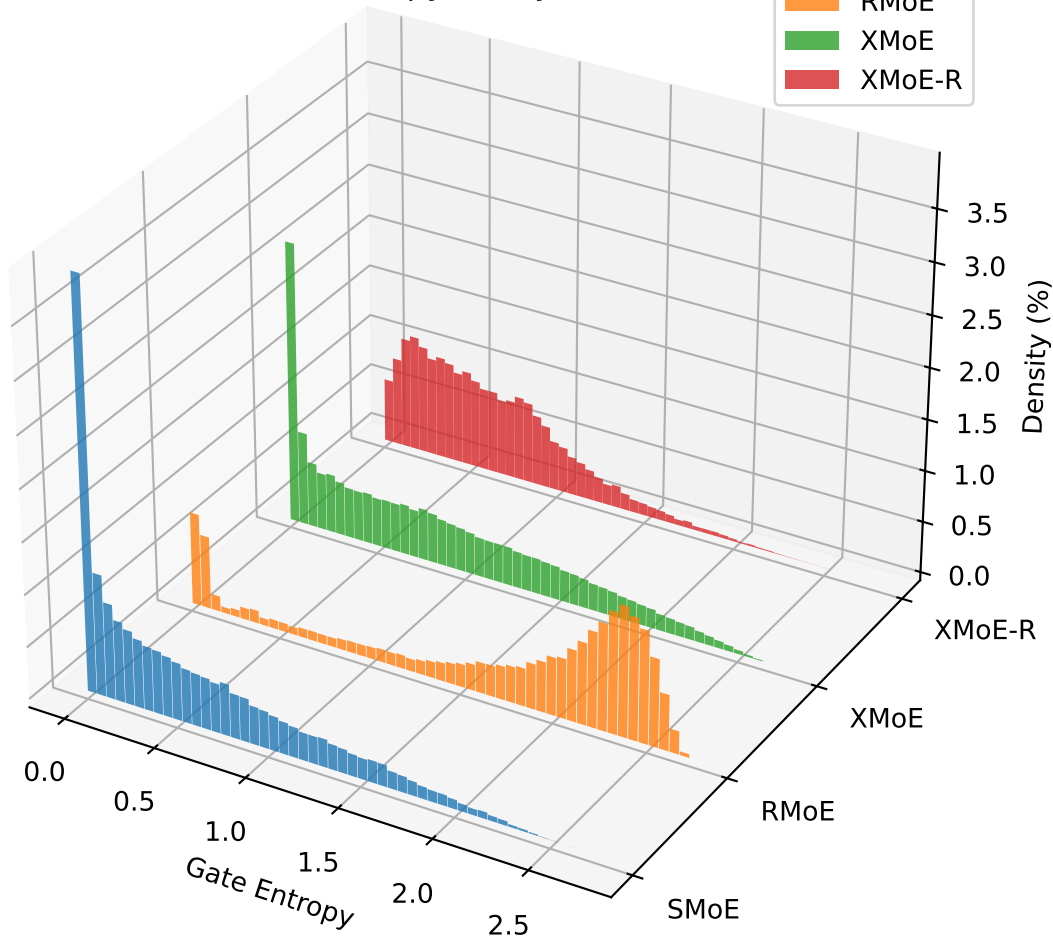

Supplement: supplementary_material [file attachment]

Entropy of Layer 3

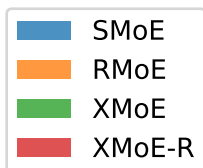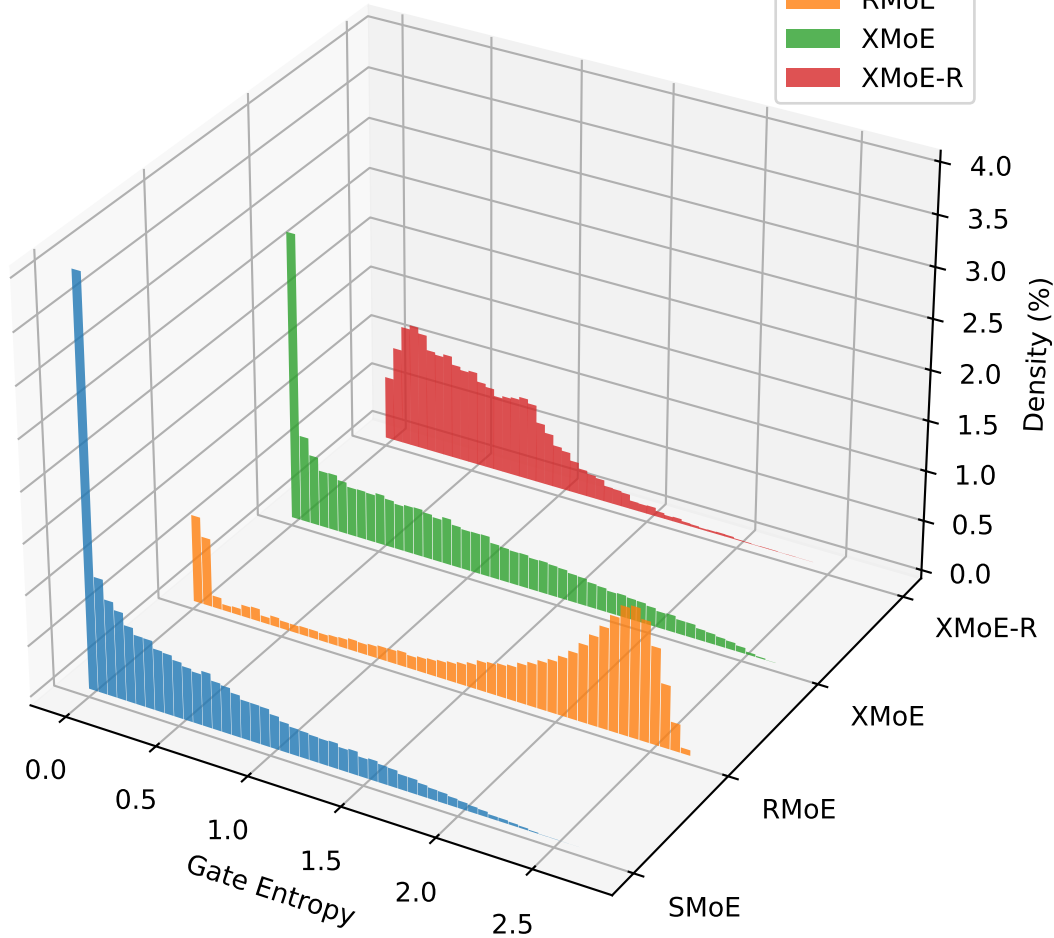

Supplement: supplementary_material [file attachment]

entropy of layer 1

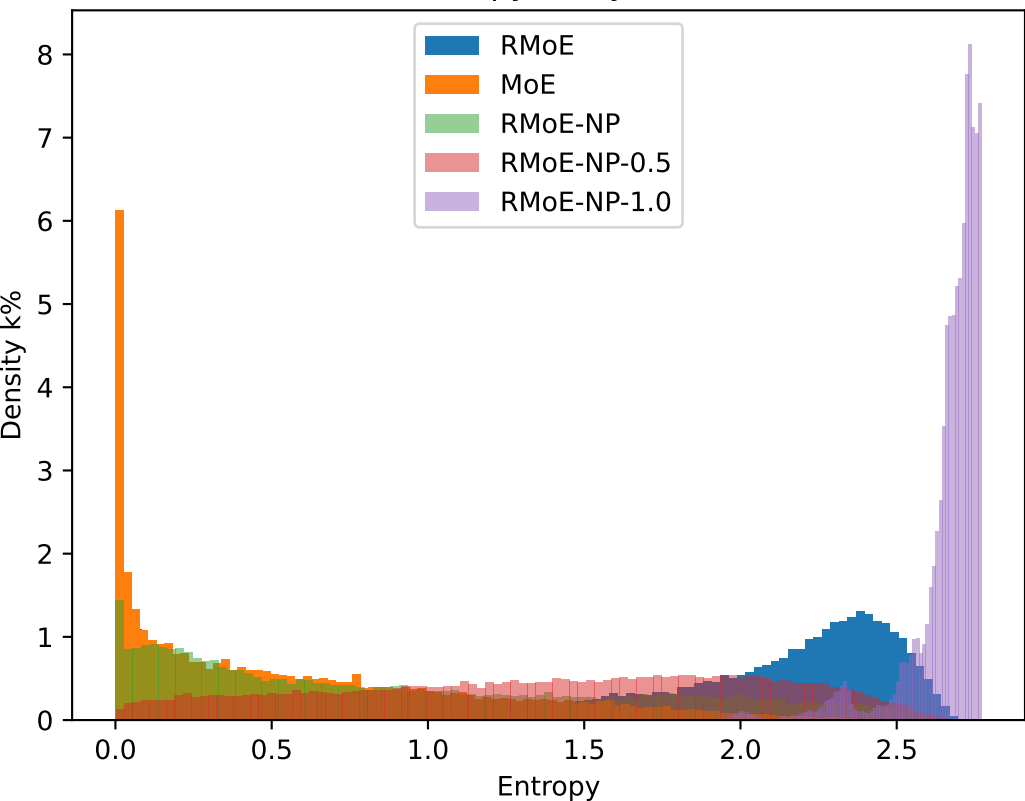

Supplement: supplementary_material [file attachment]

Expert Frequency of MoE



Supplement: supplementary_material [file attachment]

Expert Frequency Entropy

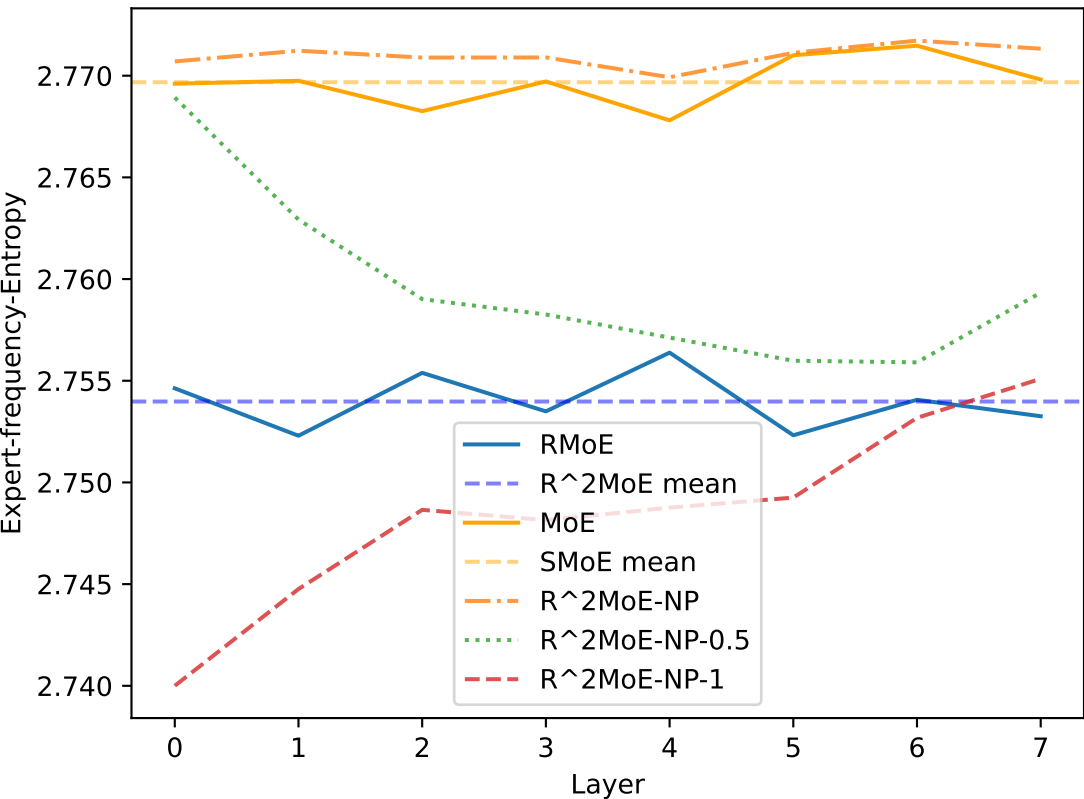

Supplement: supplementary_material [file attachment]

Expert Frequency of XMoE-R

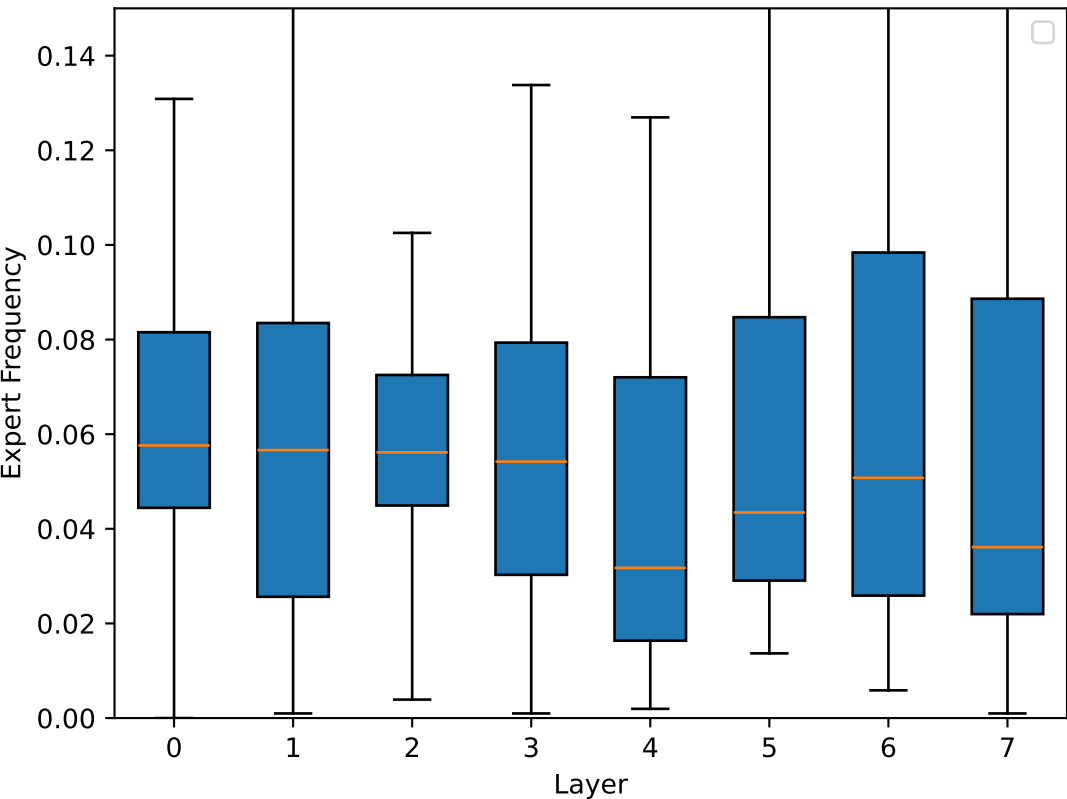

Supplement: supplementary_material [file attachment]

Entropy of Layer 7 / (7)

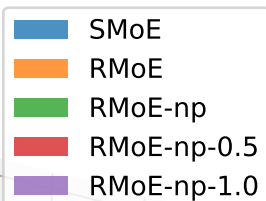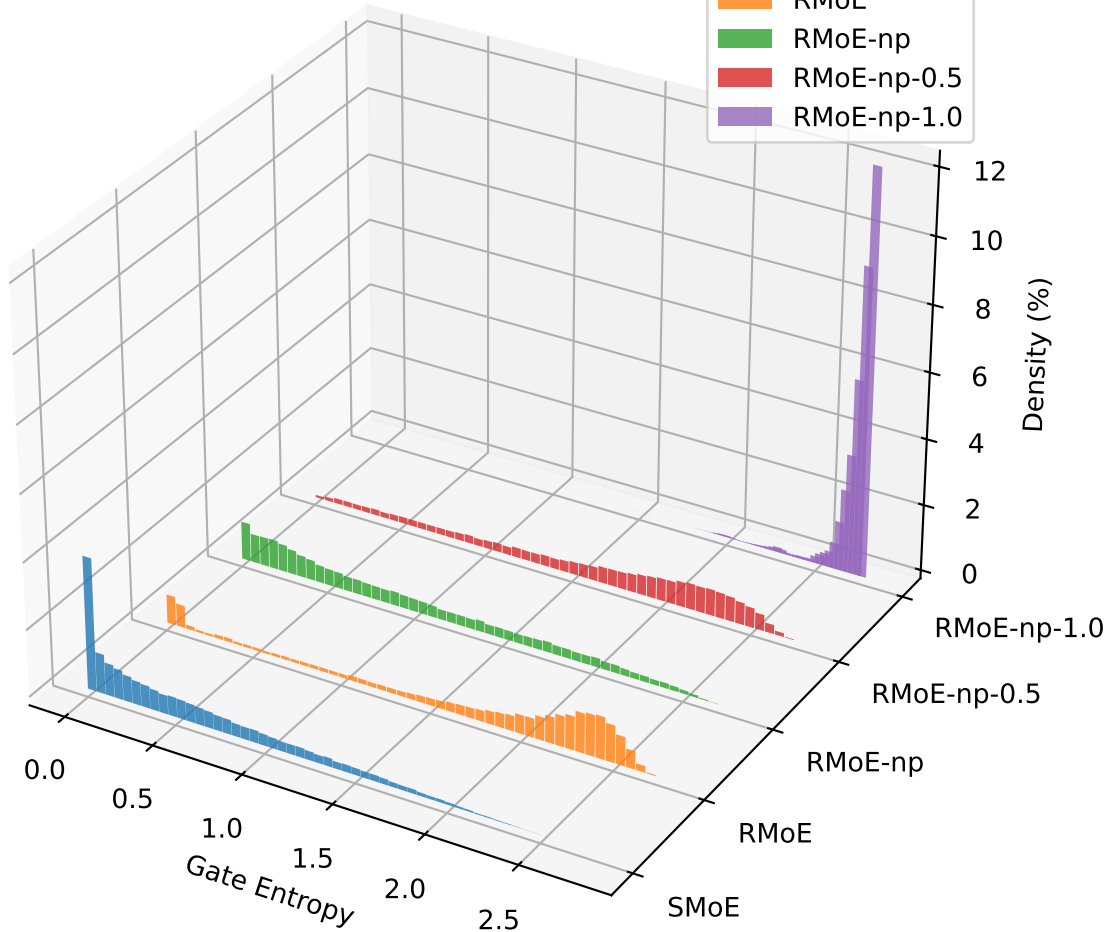

Supplement: supplementary_material [file attachment]

Expert Frequency of RMoE



Supplement: supplementary_material [file attachment]

entropy of layer 2

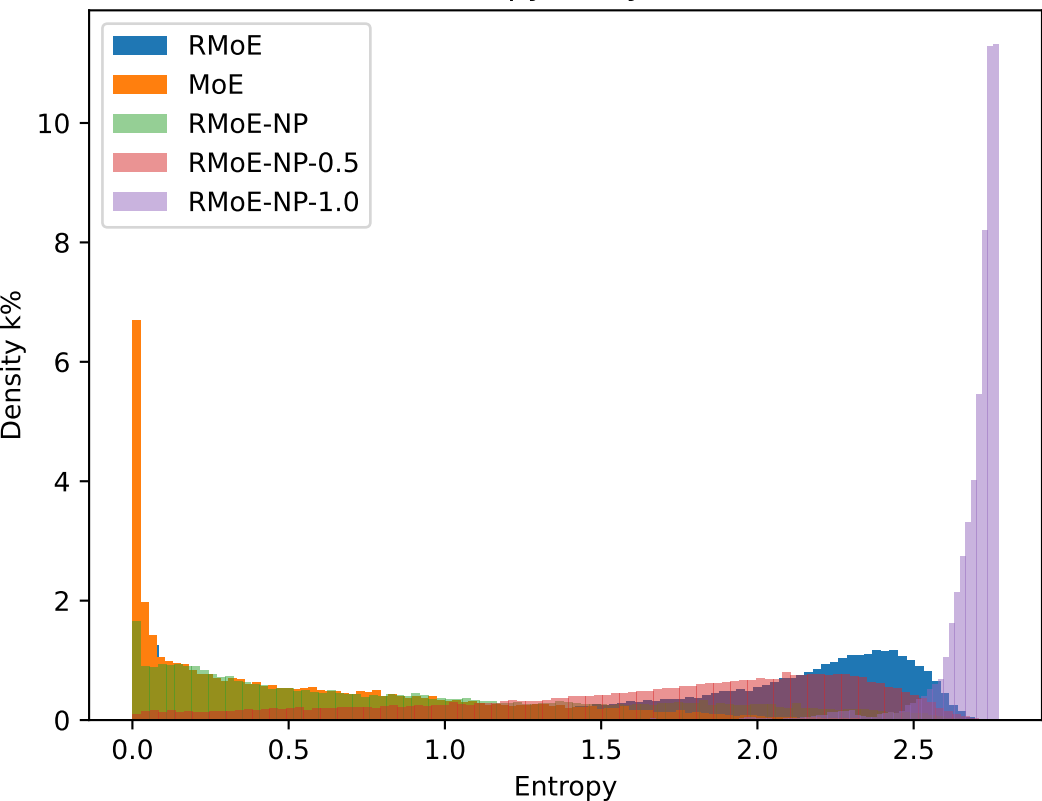

Supplement: supplementary_material [file attachment]

Expert Frequency of HyperMoE

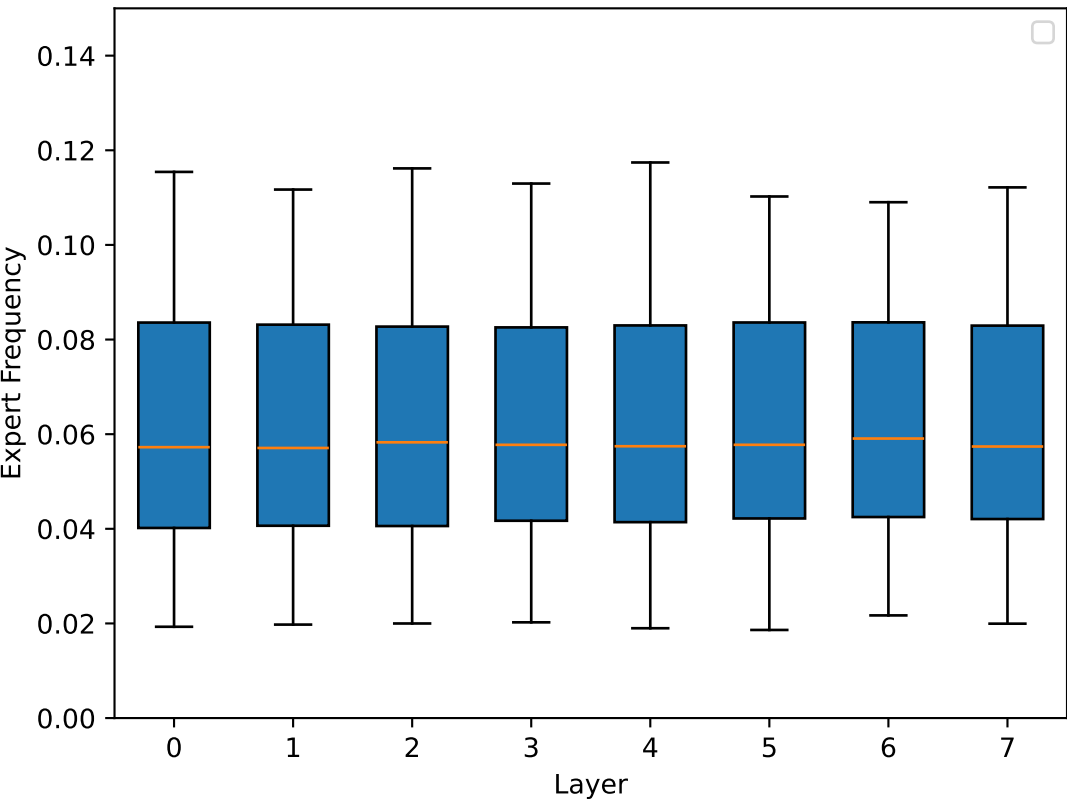

Supplement: supplementary_material [file attachment]

Entropy of Layer 6 / (7)

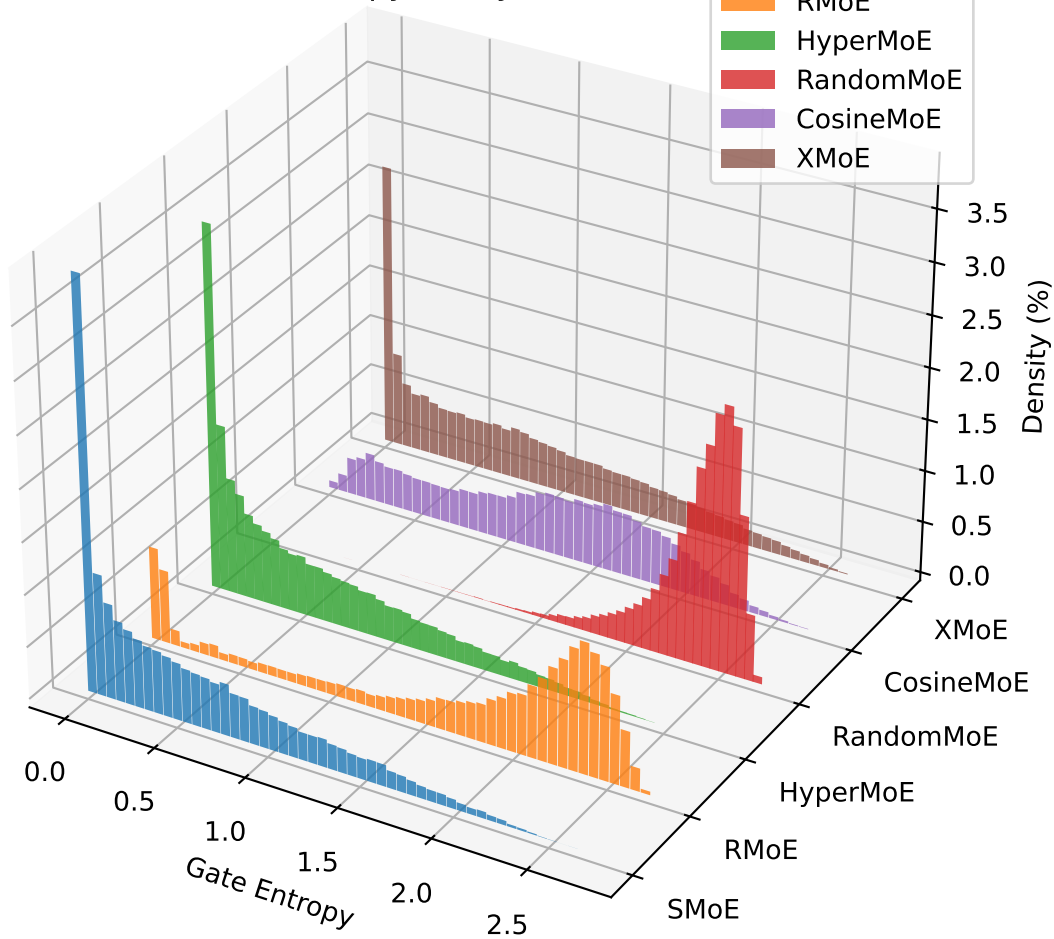

Supplement: supplementary_material [file attachment]

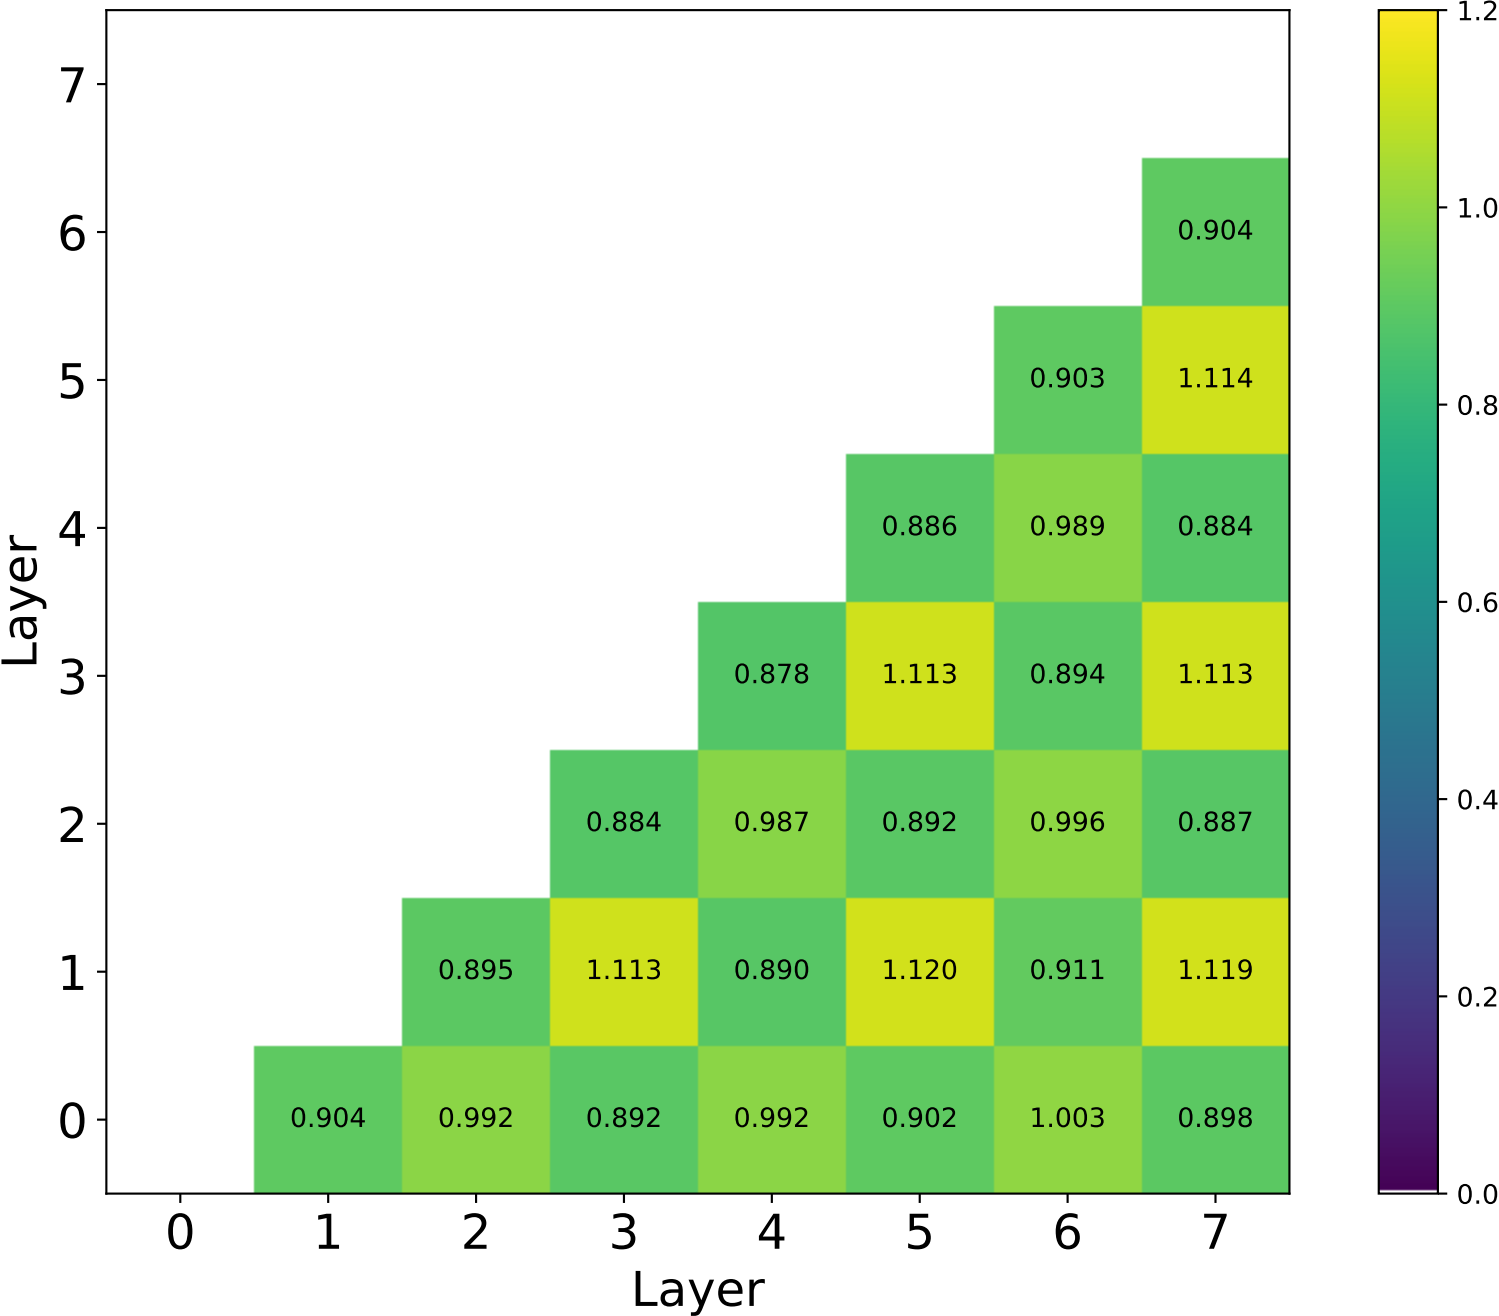

(d) Mean MI of RMoE

Supplement: supplementary_material [file attachment]

Entropy of Layer 5

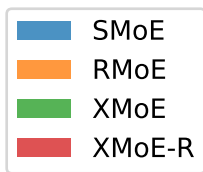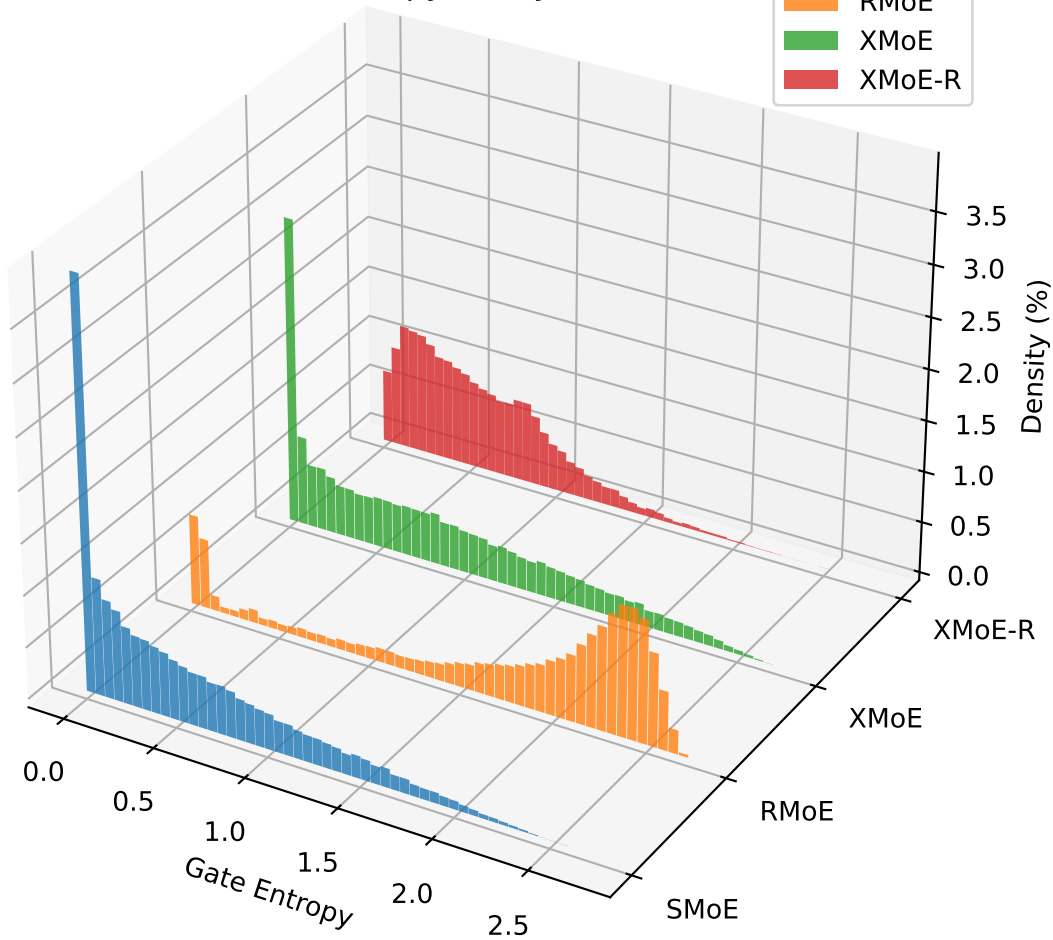

Supplement: supplementary_material [file attachment]

entropy of layer 6

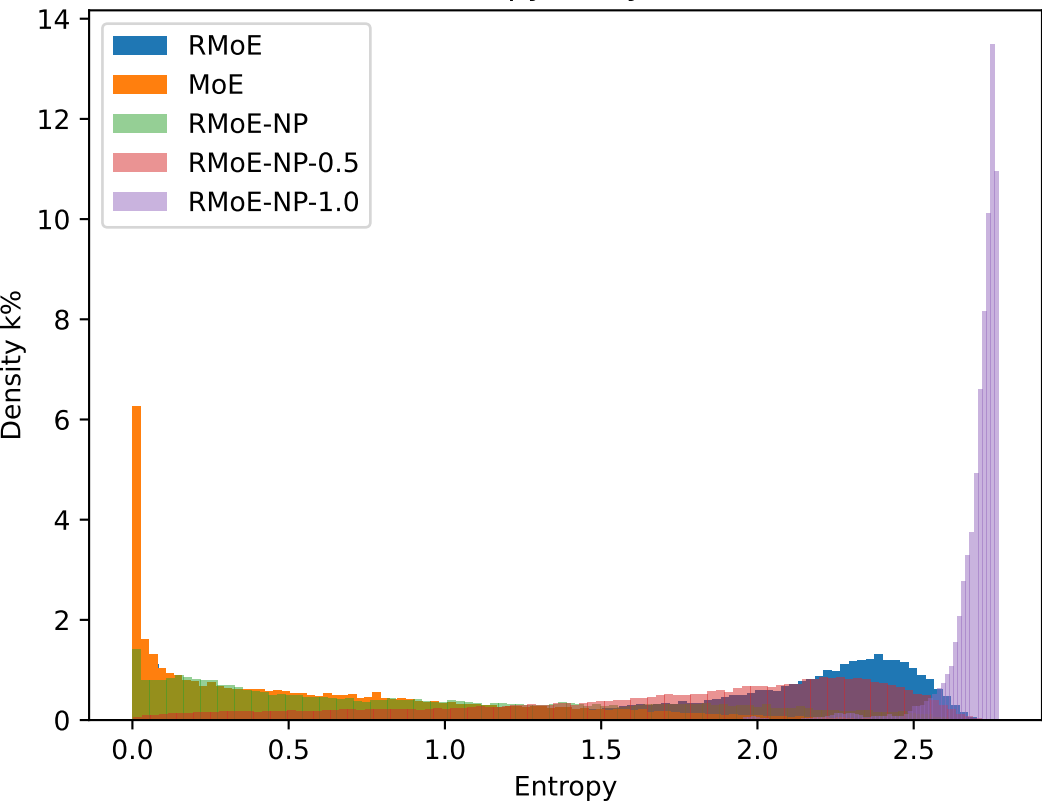

Supplement: supplementary_material [file attachment]

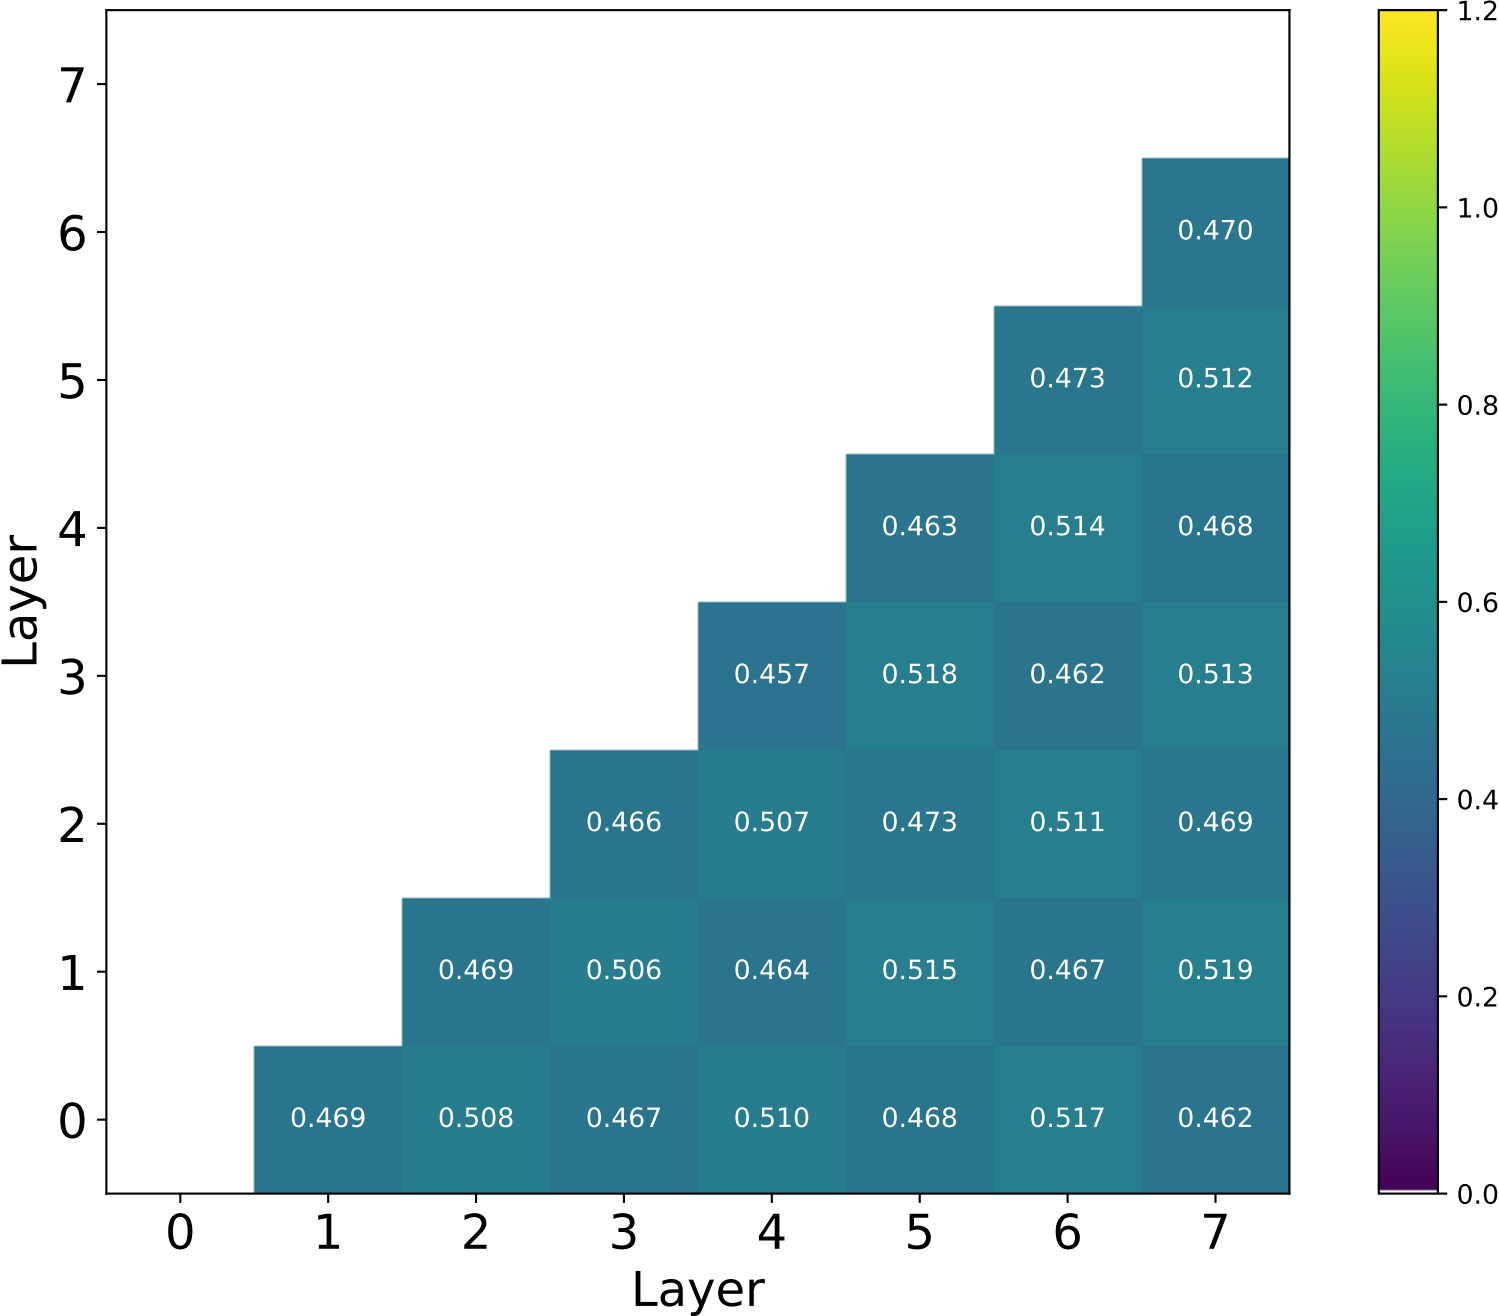

(e) Mean MI of RMoE-NP

Supplement: supplementary_material [file attachment]
